# Supplementary material for: Reliability of coded data to identify earliest indications of cognitive decline, cognitive evaluation and Alzheimer’s disease diagnosis: a pilot study in England
Source: PubMed Central journal article supplement — BMJ Open. 2018 Mar 22;8(3):e019684. doi: 10.1136/bmjopen-2017-019684 (PMC5875601; doi:10.1136/bmjopen-2017-019684), 2018-03-22
Supplement: bmjopen-2017-019684.draft_revisions.pdf [file bmjopen-2017-019684.draft_revisions.pdf]

# BMJ Open

BMJ Open is committed to open peer review. As part of this commitment we make the peer review history of every article we publish publicly available.

When an article is published we post the peer reviewers' comments and the authors' responses online. We also post the versions of the paper that were used during peer review. These are the versions that the peer review comments apply to.

The versions of the paper that follow are the versions that were submitted during the peer review process. They are not the versions of record or the final published versions. They should not be cited or distributed as the published version of this manuscript.

BMJ Open is an open access journal and the full, final, typeset and author-corrected version of record of the manuscript is available on our site with no access controls, subscription charges or pay-per-view fees (<http://bmjopen.bmj.com>).

If you have any questions on BMJ Open's open peer review process please email [info.bmjopen@bmj.com](mailto:info.bmjopen@bmj.com)

# BMJ Open

## Reliability of Coded Data to Identify Earliest Indications of Cognitive Decline, Cognitive Evaluation, and Alzheimer's Disease Diagnosis: A Pilot Study in England

|                                 |                                                                                                                                                                                                                                                                                                                                                                                                                                                                                  |
|---------------------------------|----------------------------------------------------------------------------------------------------------------------------------------------------------------------------------------------------------------------------------------------------------------------------------------------------------------------------------------------------------------------------------------------------------------------------------------------------------------------------------|
| Journal:                        | <i>BMJ Open</i>                                                                                                                                                                                                                                                                                                                                                                                                                                                                  |
| Manuscript ID                   | bmjopen-2017-019684                                                                                                                                                                                                                                                                                                                                                                                                                                                              |
| Article Type:                   | Research                                                                                                                                                                                                                                                                                                                                                                                                                                                                         |
| Date Submitted by the Author:   | 18-Sep-2017                                                                                                                                                                                                                                                                                                                                                                                                                                                                      |
| Complete List of Authors:       | Dell'Agnello, Grazia; Eli Lilly Italia SpA<br>Desai, Urvi; Analysis Group, Inc.,<br>Kirson, Noam; Analysis Group, Inc.<br>Wen, Jody; Analysis Group, Inc.<br>Meiselbach, Mark; Analysis Group, Inc.<br>Reed, Catherine; Eli Lilly and Company (Lilly UK)<br>Belger, Mark; Eli Lilly and Company (Lilly UK)<br>Lenox-Smith, Alan; Eli Lilly and Company (Lilly UK)<br>Martinez, Carlos; Institute for Epidemiology, Statistics and Informatics GmbH<br>Rasmussen, Jill; psi-napse |
| <b>Primary Subject Heading</b>: | Research methods                                                                                                                                                                                                                                                                                                                                                                                                                                                                 |
| Secondary Subject Heading:      | Medical management, Mental health, Health services research                                                                                                                                                                                                                                                                                                                                                                                                                      |
| Keywords:                       | Clinical Practice Research Datalink, medical coding, text-based data, Alzheimer's disease                                                                                                                                                                                                                                                                                                                                                                                        |
|                                 |                                                                                                                                                                                                                                                                                                                                                                                                                                                                                  |

SCHOLARONE™  
Manuscripts

1  
2  
3 **Reliability of Coded Data to Identify Earliest Indications of Cognitive Decline, Cognitive**  
4 **Evaluation, and Alzheimer's disease Diagnosis: A Pilot Study in England**  
5  
6

7 **Authors:**

8 Grazia Dell'Agnello, PhD<sup>1</sup>; Urvi Desai, PhD<sup>2</sup>; Noam Y. Kirson, PhD<sup>2</sup>; Jody Wen, BS<sup>2</sup>; Mark K  
9 Meiselbach, BS<sup>2</sup>; Catherine C Reed, PhD<sup>3</sup>; Mark Belger, BSc<sup>3</sup>; Alan Lenox-Smith, MBBS,  
10 FFPM, FRCP<sup>4</sup>; Carlos Martinez, MD<sup>5</sup>; Jill Rasmussen, MBChB, FRCGP, FFPM<sup>6</sup>  
11  
12

13  
14 **Affiliations:**

15 <sup>1</sup> Eli Lilly Italia SpA, 50019 Sesto Fiorentino (FI), Italy

16  
17 <sup>2</sup> Analysis Group, Inc., 111 Huntington Ave, 14th floor, Boston, MA 02199

18  
19 <sup>3</sup> Eli Lilly and Company (Lilly UK), Windlesham, Surrey, UK

20  
21 <sup>4</sup> Eli Lilly and Company (Lilly UK), Priestley Road, Basingstoke, UK

22  
23 <sup>5</sup> Institute for Epidemiology, Statistics and Informatics GmbH, Frankfurt, Germany

24  
25 <sup>6</sup> psi-napse, Dorking, Surrey, UK  
26  
27  
28  
29  
30

31 **Corresponding Author:**

32 Urvi Desai, PhD

33  
34 Analysis Group, Inc., 111 Huntington Avenue, 14<sup>th</sup> floor, Boston, MA 02199

35  
36 Phone: (617)425-8315

37  
38 Fax number: (617)425-8001

39  
40 Email: [urvi.desai@analysisgroup.com](mailto:urvi.desai@analysisgroup.com)  
41  
42  
43  
44  
45  
46

47 **Word Count:** 3,623 (not including abstract, summary of strengths and limitations, ethics  
48 statement, data availability, competing interests, funding, author contributions, and references).  
49

50 **Exhibits:** 5 for the main document, 2 for Appendix  
51  
52  
53  
54  
55  
56  
57  
58  
59  
60

## Abstract (294/300 Words; excluding section headers)

**Objectives:** To evaluate the feasibility of using diagnosis codes and prescription data to identify timing of symptomatic onset, cognitive assessment, and diagnosis of Alzheimer's disease (AD).

**Methods:** This was a retrospective cohort study using the UK Clinical Practice Datalink (CPRD). The study cohort consisted of a random sample of 50 patients with a first diagnosis of AD in 2010-2013. Additionally, patients were required to have a valid text-field code and a hospital episode or a referral in the 3 years before the first AD diagnosis. The earliest indications of cognitive impairment, cognitive assessment, and AD diagnosis were identified using two approaches: 1) using an algorithm based on diagnostic codes and prescription drug information, 2) using information compiled from manual review of both text-based and coded data. The reliability of the code-based algorithm for identifying the earliest dates of the three measures described earlier was evaluated relative to the comprehensive second approach. Additionally, common cognitive assessments (with and without results) were described for both approaches.

**Results:** The two approaches identified the same first dates of cognitive symptoms in 33 (66%) of the 50 patients, first cognitive assessment in 29 (58%) patients, and first AD diagnosis in 43 (86%) patients. Allowing for the dates from the two approaches to be within 30 days, the code-based algorithm's success rates increased to 74%, 70%, and 94%, respectively. Mini Mental State Examination (MMSE) was the most commonly observed cognitive assessment in both approaches, however of the 53 tests performed, only 19 results were observed in the coded data.

**Conclusions:** The code-based algorithm shows promise for identifying the first AD diagnosis. However, the reliability of using coded data to identify earliest indications of cognitive

1  
2  
3 impairment and cognitive assessments is questionable. Additionally, CPRD is not a  
4  
5 recommended data source to identify results of cognitive assessments.  
6  
7

8 **Keywords:** Clinical Practice Research Datalink, medical coding, text-based data, Alzheimer's  
9  
10 disease  
11  
12  
13  
14  
15  
16  
17  
18  
19  
20  
21  
22  
23  
24  
25  
26  
27  
28  
29  
30  
31  
32  
33  
34  
35  
36  
37  
38  
39  
40  
41  
42  
43  
44  
45  
46  
47  
48  
49  
50  
51  
52  
53  
54  
55  
56  
57  
58  
59  
60

## Summary of strengths and limitations

- Using enriched data elements from both structured data fields and physician notes, this study not only identified relevant medical codes and prescriptions related to timing of onset of cognitive symptoms, cognitive assessments, and AD diagnosis, but also captured an additional marker of cognitive assessment based on sequencing of clinical interactions.
- The study findings also provide important insight into the availability of results from cognitive assessments from both physician notes and coded data.
- However, the study relies on Read codes and ICD-10 codes, which do not contain information by which to confirm clinical diagnoses, severity of illness, or physician interpretation, and does not include data from memory clinics, a key setting in which cognitive assessments are conducted in England.
- Additionally, the study focuses on patients with AD who had no evidence of other dementia etiologies.
- Finally, the study utilizes data prior to 2014, so study findings may not reflect the current practices in management of patients with dementia in England.

## Background

The Alzheimer's Society of the UK estimates that approximately 1% of the entire UK population currently has some form of dementia.<sup>1</sup> Alzheimer's disease (AD) is the most common cause of dementia and accounts for approximately 62% of all dementias in the UK. The pathophysiological changes underlying AD may develop well before a formal diagnosis, resulting in early symptoms of cognitive impairment such as memory loss, attention deficits, impaired reasoning, poor judgment, and confusion prior to the diagnosis.<sup>2,3,4,5</sup>

The diagnosis of AD can be challenging, and requires assessment of cognitive, functional, and/or behavioral symptoms of patients suspected of having cognitive impairment.<sup>6,7</sup> Recent policy efforts in England have aimed to improve diagnosis rate and management of dementia,<sup>8</sup> as earlier, more accurate evaluation and diagnosis is believed to be important to improving potential health outcomes for patients and their caregivers as well as reduce the burden associated with dementia.<sup>9</sup> Information about use of and results from various evaluation tools – including tools for initial assessment (mainly in the primary care setting) such as the General Practitioner Assessment of Cognition (GPCOG), the Abbreviated Mental Test Score (AMTS), Six-Item Cognitive Impairment Test (6CIT), and for diagnosis (mainly in the secondary care settings) such as the Addenbrooke's Cognitive Assessment- Revised (ACE-R), Mini mental state examination (MMSE) and Montreal Cognitive Assessment (MOCA)<sup>10,11</sup> – can provide important insight regarding practice patterns during the screening and diagnostic process as well as severity of symptoms of cognitive impairment. However, this information may often not be captured in existing, structured, real-world data sources used to conduct observational studies. In addition, early symptoms associated with cognitive decline, such as mild memory impairment, might only be noted in free text fields that summarize physicians' notes and/or

1  
2  
3 correspondence provided by specialists evaluating these patients in secondary care settings.  
4  
5 These supplemental data elements are generally not available to researchers, which limits the  
6  
7 ability to identify the timing of onset of symptoms and subsequent cognitive testing.  
8  
9

10 In addition, to the best of our knowledge, no study to date has evaluated whether the  
11  
12 information captured within these supplemental text data fields provides any additional insight  
13  
14 over the coded data (e.g., diagnosis codes) into the timing of onset of cognitive impairment  
15  
16 symptoms and subsequent testing among patients eventually diagnosed with AD. Previous  
17  
18 studies assessing the validity of coded data (including but not limited to dementia diagnoses)  
19  
20 typically relied on reviews of medical records, physician surveys, and comparisons to other data  
21  
22 sources.<sup>12</sup> The objective of the present exploratory study was to assess the reliability of a code-  
23  
24 based algorithm to identify the timing of symptomatic onset, cognitive assessment (including  
25  
26 initial screening), and formal diagnosis of AD, as compared to the combination of codes and  
27  
28 supplemental, non-structured physicians' notes and secondary care correspondence. An  
29  
30 additional objective was to compare the availability of results from the cognitive assessments  
31  
32 prior to AD diagnosis between the structured data and the anonymized text data.  
33  
34  
35  
36

## 37 **Methods**

### 38 **Data**

39  
40  
41 The study was conducted using a subset of the UK Clinical Practice Research Datalink  
42  
43 (CPRD), which includes longitudinal observational data from general practitioner (GP)  
44  
45 electronic health record systems in primary care practices, including medical diagnoses (using  
46  
47 Read codes), referrals to specialists and to secondary care, testing and interventional procedures  
48  
49 conducted in primary care, lifestyle information (e.g., smoking, exercise), and drugs prescribed  
50  
51  
52  
53  
54  
55  
56  
57  
58  
59  
60



1  
2  
3 in primary care.<sup>13</sup> The subset consisted of patients in the CPRD with a link to hospitalizations  
4 and outpatient encounters in the Hospital Episode Statistics (HES) dataset.  
5  
6

7  
8 Until recently (May 2015), the CPRD database also included pseudo-anonymized text  
9 fields summarizing notes entered by the GP or providers during consultations, which were made  
10 available to researchers upon special request.<sup>12</sup> In addition, it is possible to request de-identified  
11 secondary care correspondence received by the GPs. These correspondences provide  
12 supplemental information regarding the patient's encounters in secondary care settings such as  
13 hospitals.  
14  
15  
16  
17  
18  
19  
20

### 21 **Sample selection**

22  
23  
24 The population for this pilot study was selected in two steps. In Step 1, a cohort of  
25 patients with earliest indication of AD in 2010-2013, who were eligible for linkage to HES and  
26 were continuously enrolled in active CPRD practice for  $\geq 12$  months before the first AD  
27 diagnosis, were selected. Indication of AD was defined as the first Read code, ICD-10 code, or  
28 prescription medication for AD. Patients were required to have no records with diagnosis of  
29 other types of dementia (e.g., vascular dementia) between or after the two most recent records  
30 indicating AD.  
31  
32  
33  
34  
35  
36  
37  
38  
39

40 In order to ensure that the cohort of patients with AD had at least one encounter where all  
41 data elements, including physician notes and correspondence from secondary care settings, may  
42 be available, all patients were required to have  $\geq 1$  consultation record with a non-missing, non-  
43 zero text identifier and  $\geq 1$  HES record or  $\geq 1$  referral record indicating a visit to a specialist (e.g.,  
44 psychiatrist, neurologist, geriatrician) in the three years prior to the first AD diagnosis.  
45  
46  
47  
48  
49  
50

51 To facilitate detailed examination of linked free text information, a sample of 50 patients  
52 was randomly drawn from the cohort meeting the criteria in Step 1 for further analysis. A  
53  
54  
55  
56  
57  
58  
59  
60

1  
2  
3 random sampling approach was used to increase the likelihood that the sub-sample selected was  
4  
5 representative of the overall cohort identified in Step 1.  
6

### 7 8 **Development of the code-based algorithm** 9

10       Earliest indications of symptoms of cognitive decline (e.g., “memory loss symptom”),  
11 cognitive assessment (for either screening or diagnosis), and AD diagnosis were identified using  
12 two parallel approaches. In the first approach, the Read codes, ICD-10 codes, and prescription  
13 medications indicated to treat AD found in the structured part of CPRD from up to 3 years prior  
14 to the AD diagnosis were reviewed and categorized into an algorithm to establish first observed  
15 dates of the three key time points in the pathway of progression from onset of symptoms to AD  
16 diagnosis.  
17  
18  
19  
20  
21  
22  
23  
24  
25

26       In the second approach, in addition to the diagnosis codes, a targeted search of the  
27 pseudo-anonymised text data and additional correspondence provided by the GPs was conducted  
28 to identify key phrases suggestive of the earliest markers of symptoms related to cognitive  
29 impairment (e.g., “memory loss”, “cognitive impairment”, “confusion”, etc., and their variants),  
30 cognitive assessments (e.g., “GPCOG”, “MMSE”, “MOCA”, “mini-mental”, etc., and their  
31 variants) and AD diagnosis. The targeted search was conducted by two independent reviewers to  
32 account for any subjective interpretation of the free-text.  
33  
34  
35  
36  
37  
38  
39  
40  
41

42       Based on preliminary data inspection and the combined manual review of the text and  
43 structured data for 15 of the 50 patients, the definition of cognitive assessment using the  
44 structured data was refined to include an additional marker based on referrals. Specifically, given  
45 that clinical evaluation for dementia is usually undertaken by secondary care mental health  
46 specialists (e.g., geriatricians, old age psychiatrists, neurologists)<sup>14</sup> several weeks after the initial  
47 referral,<sup>8</sup> it was determined that a combination of codes indicating referral to a specialist and a  
48  
49  
50  
51  
52  
53  
54  
55  
56  
57  
58  
59  
60

1  
2  
3 letter from specialist within 3 months after the referral could be considered as indication of  
4  
5 cognitive assessment. In addition, it was assumed that the earliest indication of cognitive  
6  
7 assessment could not precede the earliest symptom of cognitive impairment.  
8  
9

10 Appendix Table 1 describes the final code-based algorithm used for quality evaluation.  
11

### 12 **Quality evaluation of the reliability of the code-based algorithm**

13

14  
15 The findings from the two approaches were compared to quantify the differences in dates  
16  
17 for the first indicators of cognitive/functional symptoms, assessments, and AD diagnosis as  
18  
19 identified by the code-based algorithm and manual review. Additionally, the percent of patients  
20  
21 for whom the dates of each of the three measures (indicator for cognitive impairment symptoms,  
22  
23 cognitive assessments, and AD diagnosis) identified by the code-based algorithm were after the  
24  
25 dates suggested by the second approach (suggesting the code-based algorithm was less sensitive)  
26  
27 were calculated. Similarly, the proportions of patients for whom the dates of the three measures  
28  
29 as identified by the code-based algorithm were before the dates identified by the second  
30  
31 approach (suggesting the code-based algorithm was more sensitive) were reported. While exact  
32  
33 matches were preferred for all analyses, in order to account for delays between the receipt of a  
34  
35 letter from the specialist assessing the patient and the corresponding coding of the information in  
36  
37 CPRD, a similar metric allowing for a 30-day gap between the dates identified by the two  
38  
39 approaches was also measured. Note that for the purpose of the analysis, if an event was not  
40  
41 observed for both approaches, it was considered an exact match. However, if a date was  
42  
43 identified only in the manual review and not in the code-based algorithm, then the code-based  
44  
45 algorithm was considered less sensitive. Similarly, if a date was identified in the code-based  
46  
47 algorithm but not in manual review, the code-based algorithm was considered more sensitive.  
48  
49  
50  
51  
52  
53  
54  
55  
56  
57  
58  
59  
60

1  
2  
3 Additionally, the days between the dates of first symptom of cognitive impairment and  
4 first cognitive assessment, and between the first cognitive assessment and the first AD diagnosis  
5 were compared for the two approaches. Congruence between the two data sources with regards  
6 to recording the type of and results from the specific type of the cognitive assessments performed  
7 prior to AD diagnosis was described.  
8  
9  
10  
11  
12  
13

## 14 **Results**

### 15 **Sample characteristics**

16  
17 Overall, 18,281 patients in the CPRD had an indication of AD (based on diagnosis codes  
18 or AD-related medications) in 2010-2013 (See Figure 1). Of these, 12,252 (67%) patients had  
19 their first indication of AD in 2010-2013; 11,151 had no indications of another type of dementia  
20 between or after AD diagnoses. Of these 11,151 patients, 4,515 (40%) patients had evidence of  
21 both text-field data and receipt of care in secondary settings in the 3 years prior to the first AD  
22 diagnosis. The final sample comprised 1,937 patients who met all the inclusion and exclusion  
23 criteria (mean age 82 years, 38% males). The random sample of 50 patients (selected from the  
24 1,937 patients meeting all selection criteria) included in additional analyses had similar  
25 demographic characteristics as the 1,937 patients (mean age 82 years, 42% males). These 50  
26 patients had a total of 2,051 records with valid pseudo-anonymized text field data and 44  
27 correspondences from secondary care, provided by CPRD upon request.  
28  
29  
30  
31  
32  
33  
34  
35  
36  
37  
38  
39  
40  
41  
42  
43  
44

### 45 **Comparison of findings from the two approaches**

46  
47 Of the 50 patients included in the sample, the code-based algorithm identified 48 patients  
48 with evidence of cognitive impairment prior to AD diagnosis and 42 with evidence of cognitive  
49 assessment prior to AD diagnosis. An additional 2 and 4 patients respectively had evidence of  
50 cognitive impairment and cognitive assessment on the same date as the AD diagnosis. The  
51  
52  
53  
54  
55  
56  
57  
58  
59  
60

1  
2  
3 remaining 4 patients had no record of cognitive assessment prior to or on the same date as the  
4 AD diagnosis (Appendix Figure 1). For the second, comprehensive approach which utilized  
5 information from all available data elements including text-based data, the number of patients  
6 with cognitive impairment and cognitive assessments prior to AD diagnosis were 49 and 43  
7 respectively, and the numbers of patients with the same dates for these metrics as the AD  
8 diagnosis were 1 and 4 respectively. No record of cognitive assessment was observed prior to or  
9 on the same date as the AD diagnosis for 3 patients (Appendix Figure 1).

19 With regards to the timing of the three key events, relative to the second approach, the  
20 code-based algorithm was able to identify exact matches for the first date of symptoms  
21 associated with cognitive impairment in 33 (66%) of the 50 patients, first cognitive assessment in  
22 29 (58%) patients, and first AD diagnosis in 43 (86%) patients (Table 1). Allowing for matches  
23 within 30 days, the algorithm's success rates increased to 74%, 70%, and 94%, respectively, for  
24 the dates of first cognitive impairment symptom, first cognitive assessment, and first AD  
25 diagnosis. Differences in the dates detected by the code-based algorithm relative to the more  
26 comprehensive approach were mainly a result of more false negatives generated with the  
27 algorithm. There was only 1 patient (2% of the sample), for whom, the date of first symptoms of  
28 cognitive impairment identified by the algorithm was earlier than the date identified by the  
29 second, comprehensive approach, suggesting the algorithm was more sensitive. The results were  
30 similar even after allowing for a 30-day gap in the dates identified by the two approaches. With  
31 respect to identifying the dates of first cognitive assessment the code-based algorithm was found  
32 to be more sensitive than the comprehensive approach in 8 patients (16%) based on exact  
33 matches and 4 patients (8%) allowing for matches within 30 days. The differences in the  
34  
35  
36  
37  
38  
39  
40  
41  
42  
43  
44  
45  
46  
47  
48  
49  
50  
51  
52  
53  
54  
55  
56  
57  
58  
59  
60

detection of the first date of AD diagnosis between the code-based algorithm and manual review based on either exact matches or matches within 30 days were very small.

**Table 1: Differences in dates of earliest indications of cognitive impairment, cognitive assessment, and AD diagnosis as identified by coded-data vs. comprehensive data review (N=50)**

|                                                                      | First symptom | First cognitive assessment | AD diagnosis |
|----------------------------------------------------------------------|---------------|----------------------------|--------------|
| <b>Date matches with manual review, n (%)</b>                        |               |                            |              |
| Exact matches                                                        | 33 (66.0%)    | 29 (58.0%)                 | 43 (86.0%)   |
| Matches $\pm$ 30 days                                                | 37 (74.0%)    | 35 (70.0%)                 | 47 (94.0%)   |
| <b>Characteristics of mismatches, n (%)</b>                          |               |                            |              |
| Code-based algorithm more sensitive than manual review               | 1 (2.0%)      | 8 (16.0%)                  | 0 (0.0%)     |
| Code-based algorithm more sensitive than manual review (< -30 days)  | 1 (2.0%)      | 4 (8.0%)                   | 0 (0.0%)     |
| Code-based algorithm less sensitive than manual review               | 16 (32.0%)    | 13 (26.0%)                 | 7 (14.0%)    |
| Code-based algorithm less sensitive than manual review (> + 30 days) | 12 (24.0%)    | 11 (22.0%)                 | 3 (6.0%)     |

**Abbreviation:** AD = Alzheimer's disease

**Notes:**

Manual review included the review of both structured data and text-based data; cases where dates were not observed by either approach (n=2 for cognitive assessment only) were considered exact matches; if the algorithm generated a date value that either preceded the equivalent date in the manual review or for which an equivalent date in the manual review as not observed, it was considered as having resulted in a false positive, suggesting the algorithm was more sensitive than the manual review.

Additionally, the code-based algorithm and the comprehensive review of all data elements returned qualitatively similar gaps between the dates of first symptom of cognitive impairment and first cognitive assessment, and between the first cognitive assessment and the first AD diagnosis. For both approaches, the median time between first symptom and cognitive assessment was under 6 weeks (37 days for the manual review and 14 days for the algorithm) whereas the median time between the first cognitive assessment and the first AD diagnosis was

1  
2  
3 between 6-7 months (214 days for the manual review and 181 days for the algorithm) (Figures 2  
4 and 3).  
5  
6

7  
8 In terms of the specific types of cognitive assessments performed prior to AD diagnosis,  
9  
10 34 (68%) patients had information available on the type of cognitive assessments conducted.  
11  
12 Among these, very few patients received screening-type evaluations: 3 patients received the  
13  
14 AMTS, 5 patients received the 6CIT, and 1 patient received GPCOG (Table 2). The more  
15  
16 detailed evaluations captured in the data included the ACE-R (5/50 patients) and the MMSE  
17  
18 (30/50 patients; a total of 53 assessments). A total of 9 patients received multiple tests prior to  
19  
20 AD diagnosis, primarily in addition to  $\geq 1$  MMSE assessment (Table 2). For the most commonly  
21  
22 administered cognitive assessment – the MMSE – the results were largely captured only in the  
23  
24 supplemental (text-based) data. Specifically, 38 out of the 53 assessments had valid test scores  
25  
26 available in the text-based data, only 6 of which were available and were consistent in both data  
27  
28 sources. Additional 13 scores were observable only in the structured portion of the data, and  
29  
30 neither data source reported scores for the remaining two assessments.  
31  
32  
33  
34  
35  
36  
37  
38  
39  
40  
41  
42  
43  
44  
45  
46  
47  
48  
49  
50  
51  
52  
53  
54  
55  
56  
57  
58  
59  
60

**Table 2: Descriptive characteristics of cognitive assessments in the three years prior to AD diagnosis (N=50)**

| Cognitive testing characteristic                      | n (%)      |
|-------------------------------------------------------|------------|
| <b>Any cognitive test</b>                             | 34 (68.0%) |
| <i>Type of cognitive test</i>                         |            |
| General Practitioner Assessment of Cognition (GPCOG)  | 1 (2.9%)   |
| Abbreviated Mental Test Score (AMTS)                  | 3 (8.8%)   |
| Six-item cognitive impairment test (6CIT)             | 5 (14.7%)  |
| Addenbrooke's Cognitive Examination - Revised (ACE-R) | 5 (14.7%)  |
| Mini-mental State Examination (MMSE)                  | 30 (88.2%) |
| Multiple MMSE tests                                   | 14 (46.7%) |
| <i>Multiple tests of different types</i>              |            |
| MMSE + ACE-R                                          | 3 (33.3%)  |
| MMSE + AMT                                            | 2 (22.2%)  |
| MMSE + 6CIT                                           | 2 (22.2%)  |
| 6CIT + GPCOG                                          | 1 (11.1%)  |
| MMSE + ACE-R + AMTS                                   | 1 (11.1%)  |

**Abbreviation:** AD = Alzheimer's disease

## Discussion

The results of this pilot study suggest that the information captured within the supplemental text-based data fields provide increased accuracy over the structured portion of CPRD data regarding the dates of first symptom of cognitive impairment, first cognitive assessment, and first AD diagnosis. The comparison between the code-based algorithm developed in this study and a manual review of a patient's medical history (including structured data, free text, and correspondence from secondary care settings) suggests that the concordance between the two is highest for identifying the first AD diagnosis, with diminishing effectiveness of the code-based algorithm in identifying the earliest symptoms of cognitive impairment and first cognitive assessment, respectively. Additionally, nearly two-thirds of the 50 patients



1  
2  
3 included in the study had records indicative of specific types of cognitive assessments prior to or  
4 concomitantly with their AD diagnoses. For the cognitive assessment captured most commonly  
5 in the data, the MMSE, the test results were available in the text-based data for 38 of the 53  
6 assessments, whereas the results for 13 assessments were captured only in the coded data, and  
7 the scores for the remaining 2 assessments were not available in either data source. This suggests  
8 that although the text-based data elements are more likely to capture this information, neither the  
9 coded data, nor the additional information captured in physician notes and secondary care  
10 sources provide a comprehensive view of the detailed results of cognitive assessments. This may  
11 in part be due to the fact that much of the cognitive evaluation in England is done in specialty  
12 clinics such as memory clinics and the detailed data regarding the use of and findings from  
13 cognitive assessments may not be transferred back to the GPs. Even if the information is  
14 transferred back, it may not be entered into the system. However, given the recent initiatives to  
15 increase awareness about recognizing and recording symptoms of cognitive decline within the  
16 GP setting in England (especially in populations at increased risk for dementia),<sup>8,11</sup> and improve  
17 care-coordination as well as documentation across different provider settings,<sup>15,16</sup> the quality and  
18 completeness of data recording are likely to improve in the future, which could increase the  
19 reliability of the code-based algorithm. The improved quality of the recorded data would also  
20 facilitate identification of symptoms of cognitive impairment sooner, and facilitate real-world  
21 research into implications of earlier identification of cognitive impairment on subsequent  
22 outcomes in the UK.

### 23 **Study strengths and limitations**

24 The study used data from both the structured portion of CPRD and the text fields  
25 reflecting rich, additional information from notes captured by physicians/specialists during  
26  
27  
28  
29  
30  
31  
32  
33  
34  
35  
36  
37  
38  
39  
40  
41  
42  
43  
44  
45  
46  
47  
48

1  
2  
3 consultation. Using these enriched data elements, this study developed a code-based algorithm  
4 based on the findings from an intensive manual review process independently conducted by two  
5 reviewers. In doing so, we not only identified relevant medical codes and prescriptions to  
6 identify timing of onset of cognitive symptoms, cognitive assessments, and AD diagnosis, but  
7 also captured an additional marker of cognitive assessment based on sequencing of clinical  
8 interactions. In addition, the study provides important insight into the availability of results from  
9 cognitive assessments, in particular MMSE, from both physician notes and coded data.  
10  
11  
12  
13  
14  
15  
16  
17  
18

19         However, this study also has a number of limitations. First, the study relies on the Read  
20 codes (Primary Care) and ICD-10 codes (secondary care) used within the CPRD and HES  
21 administrative records datasets, respectively. These codes are retrieved from electronic health  
22 records and hospital admission records and do not contain information by which to confirm  
23 clinical diagnoses, severity of illness, or physician interpretation. Accordingly, it is possible that  
24 some patients identified as having been diagnosed with AD, with no recorded diagnosis of other  
25 type, have other dementia etiologies instead.<sup>17</sup> In addition, for this study, though we reviewed the  
26 correspondence from secondary care, we did not have access to data from memory clinics, which  
27 is a key setting in which cognitive assessments are conducted in England. Future research should  
28 identify avenues to compare the reliability of the algorithm relative to data captured in these  
29 settings as well. This study is also limited in sample size, as the algorithm was only developed  
30 and assessed for 50 randomly selected patients who were diagnosed with AD. In addition, the  
31 algorithm may not capture all Read codes and ICD-10 codes indicative of symptoms of cognitive  
32 impairment, cognitive assessment, and AD diagnosis. As such, additional research using larger  
33 patient populations is necessary to further test the reliability and generalizability of the  
34 algorithm. Furthermore, the study was focused on patients with AD who had no evidence of  
35  
36  
37  
38  
39  
40  
41  
42  
43  
44  
45  
46  
47  
48  
49  
50  
51  
52  
53  
54  
55  
56  
57  
58  
59  
60

1  
2  
3 other dementia etiologies, and further research is needed to assess the reliability of the coded  
4 data for identifying the timing of cognitive impairment, cognitive assessment, and diagnosis  
5 among patients with other dementia etiologies. Finally, the study utilized data prior to 2014 and  
6 the study findings may not reflect the current practices in management of patients with dementia  
7 in England.  
8  
9

## 10 11 12 13 14 **Conclusions**

15  
16 Given the limited expected future availability of free text data and secondary care  
17 correspondence in CPRD, the code-based algorithm developed using data for a small sample of  
18 AD patients shows promise as a feasible alternative for identifying the earliest indications of AD.  
19 However, the reliability of using coded data to identify earliest symptoms of cognitive  
20 impairment as well as indications of cognitive assessments prior to AD diagnosis is limited. The  
21 use of coded data, in its present form, is not recommended for identifying information regarding  
22 the specific types of cognitive assessments performed, the specialty of physicians performing the  
23 assessments or the results associated with those assessments (e.g., to assess disease severity  
24 levels).  
25  
26  
27  
28  
29  
30  
31  
32  
33  
34  
35  
36

## 37 **Ethics approval and consent to participate**

38 This study was approved by the Independent Scientific Advisory committee (ISAC): Protocol #  
39 16\_043R.  
40  
41  
42  
43

## 44 **Availability of data and materials**

45 This study used the Clinical Practice Research Datalink, provided by CPRD. Per the data use  
46 agreement, the datasets supporting the conclusions of this article cannot be made available to  
47 researchers outside of the study team. However, interested readers may request the data directly  
48 from CPRD – see <https://www.cprd.com/researcher/> for more information.  
49  
50  
51  
52  
53  
54  
55  
56  
57  
58  
59  
60

### Competing interests

GD, CCR, MB, and ALS are full-time employees of Eli Lilly and Company. NYK, UD, JW, and MKM are employees of Analysis Group, Inc., a company that received funding from Eli Lilly and Company for this research. CM and JR are consultants to Eli Lilly and Company.

### Funding

This study was funded by Eli Lilly and Company.

### Authors' contributions

NYK, UD, GD, CCR, and MB contributed to the conceptual design and reviewed and discussed the study results. JW and MKM contributed to the conceptual design and performed data analysis. ALS, JR, and CM contributed in the interpretation of study findings. All authors reviewed, edited, and approved the final manuscript.

### References

1. Dementia UK: The full report. Alzheimer's Society.  
[https://www.alzheimers.org.uk/site/scripts/download\\_info.php?fileID=2323](https://www.alzheimers.org.uk/site/scripts/download_info.php?fileID=2323) Accessed February 6, 2017.
2. Mortimer JA, Borenstein AR, Gosche KM, Snowdon DA. Very Early Detection of Alzheimer Neuropathology and the Role of Brain Reserve in Modifying Its Clinical Expression. *J Geriatr Psychiatry Neurol* 2005;18: 218-223.
3. Jack CR, Knopman DS, Jagust WJ, Shaw LM, Aisen PS, Weiner MW, Petersen RC, Trojanowski JQ. Hypothetical model of dynamic biomarkers of the Alzheimer's pathological cascade. *Lancet Neurol* 2010; 9:119.
4. Peterson RC. Early diagnosis of Alzheimer's disease: Is MCI too late? *Curr Alzheimer Res.* 2009;6(4):324-330.
5. McKhann GM, Knopman DS, Chertkow H, et al. The diagnosis of dementia due to Alzheimer's disease: Recommendations from the National Institute of Aging and the Alzheimer's Association workgroup. *Alzheimer's & Dementia* 2011;1-7.

- 1  
2  
3  
4  
5  
6  
7  
8  
9  
10  
11  
12  
13  
14  
15  
16  
17  
18  
19  
20  
21  
22  
23  
24  
25  
26  
27  
28  
29  
30  
31  
32  
33  
34  
35  
36  
37  
38  
39  
40  
41  
42  
43  
44  
45  
46  
47  
48  
49  
50  
51  
52  
53  
54  
55  
56  
57  
58  
59  
60
6. National Institutes of Health. National Institutes on Aging. Alzheimer's disease diagnosis. <https://www.nia.nih.gov/alzheimers/topics/diagnosis#how> Accessed February 6, 2017.
7. NHS Choices. Alzheimer's disease diagnosis. <http://www.nhs.uk/Conditions/Alzheimers-disease/Pages/Diagnosis.aspx> Accessed February 6, 2017.
8. Government of UK. Prime Minister's challenge on dementia 2020. 2015. <https://www.gov.uk/government/publications/prime-ministers-challenge-on-dementia-2020/prime-ministers-challenge-on-dementia-2020> Accessed February 6, 2017.
9. Dubois B, Padovani A, Scheltens P, et al. Timely Diagnosis for Alzheimer's Disease: A Literature Review on Benefits and Challenges. *J Alzheimers Dis* 2015;49(3):617-631.
10. NHS Department of Health. Dementia revealed: what primary care needs to know. 2014. <https://www.england.nhs.uk/wp-content/uploads/2014/09/dementia-revealed-toolkit.pdf> Accessed February 6, 2017.
11. NHS England. Dementia diagnosis and management: a brief pragmatic resource for general practitioners. 2015. <https://www.england.nhs.uk/wp-content/uploads/2015/01/dementia-diag-mng-ab-pt.pdf> Accessed February 6, 2017.
12. Khan NF, Harrison SE, Rose PW. Validity of diagnostic coding within the General Practice Reserach Database: a systematic review. *Br J Gen Pract*. 2010 Mar;60 (572):e128-e136.
13. Herrett E, Gallagher AM, Bhaskaran K, et al. Data resource profile: Clinical Practice Research Datalink (CPRD). *Int J Epidemiol*. 2015;44(3):827-836.
14. Alzheimer's Society UK. [https://www.alzheimers.org.uk/info/20071/diagnosis/95/assessment\\_process\\_and\\_tests/2](https://www.alzheimers.org.uk/info/20071/diagnosis/95/assessment_process_and_tests/2) Accessed February 6, 2017.
15. The King's Fund. Transforming our healthcare system: ten priorities for commissioners. 2015. [https://www.kingsfund.org.uk/sites/files/kf/field/field\\_publication\\_file/10PrioritiesFinal2.pdf](https://www.kingsfund.org.uk/sites/files/kf/field/field_publication_file/10PrioritiesFinal2.pdf) Accessed February 13, 2017.
16. NHS National Information Board. Personalized health and care 2020: using data and technology to transform outcomes for patients and citizens. 2014. [https://www.gov.uk/government/uploads/system/uploads/attachment\\_data/file/384650/NIB\\_Rep\\_ort.pdf](https://www.gov.uk/government/uploads/system/uploads/attachment_data/file/384650/NIB_Rep_ort.pdf) Accessed February 13, 2017.
17. Happich M, Kirson NY, Desai U, et al. Excess costs associated with possible misdiagnosis of Alzheimer's disease among patients with vascular dementia in a UK CPRD population. *J Alzheimers Dis* 2016;53:171-183.

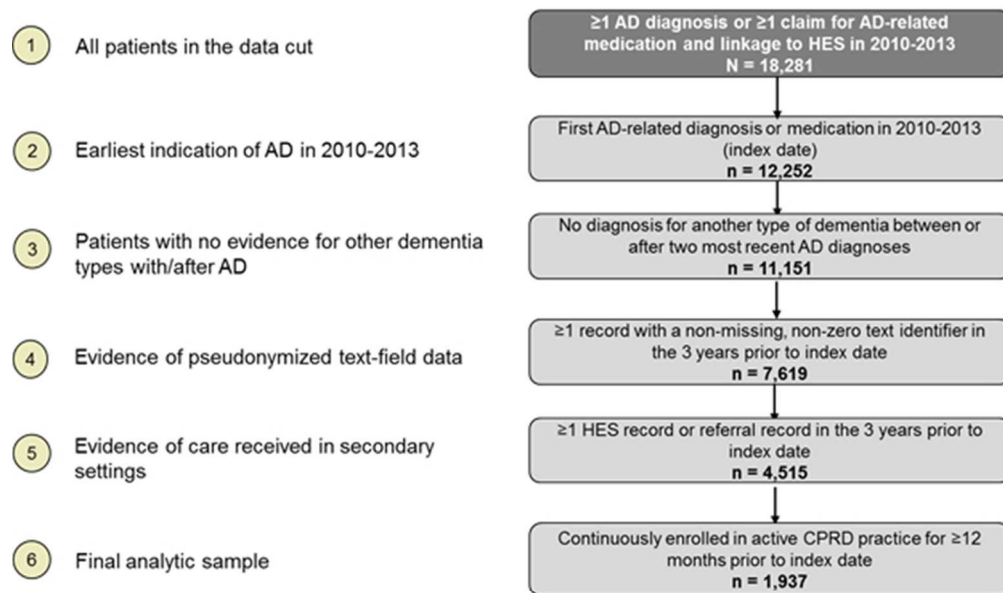

**Abbreviations:** AD = Alzheimer's disease, HES = Hospital Episode Statistics, CPRD = Clinical Practice Research Datalink

Figure 1: Sample Selection

165x112mm (96 x 96 DPI)

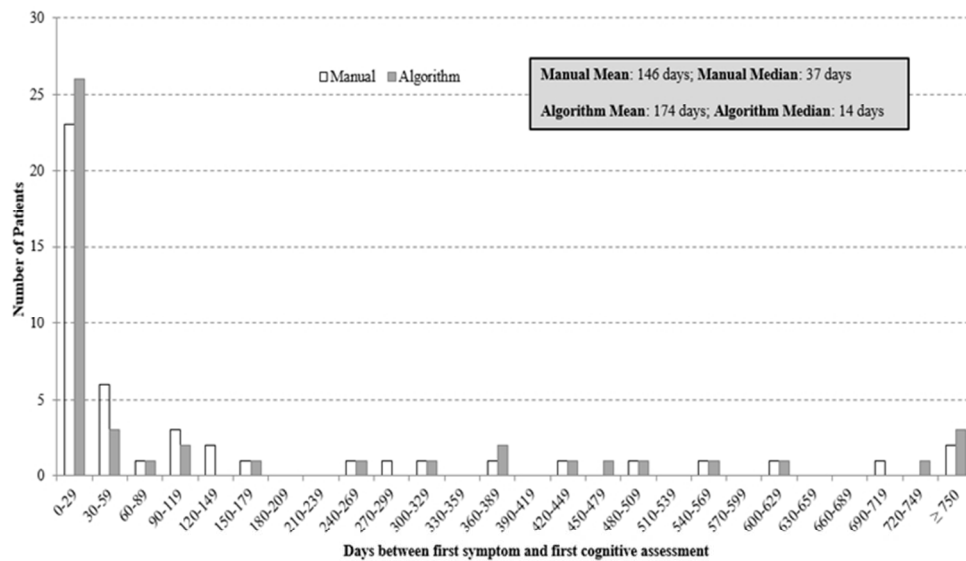

**Note:**  
Manual review included the review of both structured data and text-based data

Figure 2: Distribution of days between first cognitive symptom to cognitive assessment: code-based algorithm vs. comprehensive data review (N=50)

214x137mm (96 x 96 DPI)

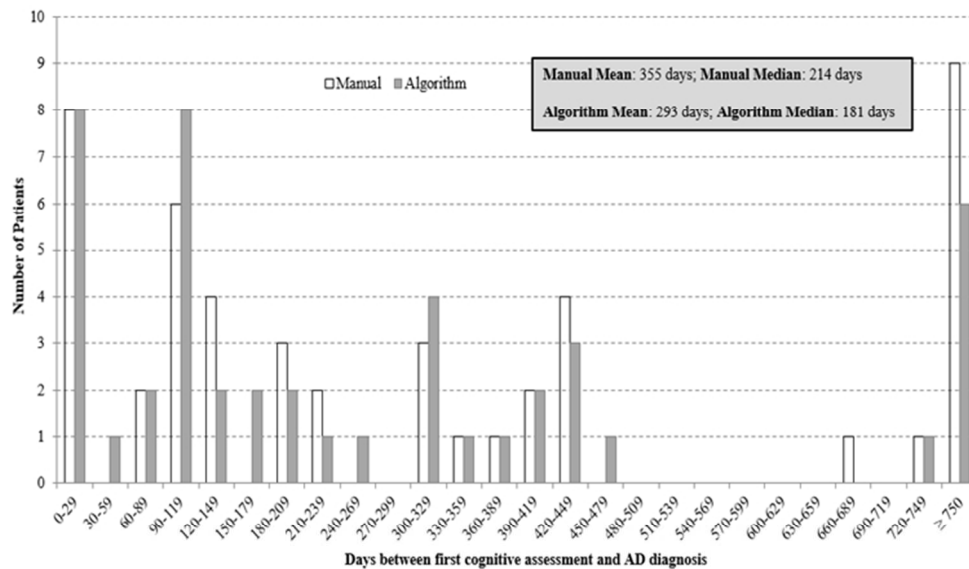

Abbreviation: AD = Alzheimer's disease

**Note:**

Manual review included the review of both structured data and text-based data

Figure 3: Distribution of days between first cognitive assessment to AD diagnosis: code-based algorithm vs. comprehensive data review (N=50)

205x148mm (96 x 96 DPI)



**Appendix Table 1: Final code-based algorithm to identify early indications of cognitive symptoms, cognitive assessment, and AD diagnosis**

| Category          | Diagnosis code       | Description                                        |                               |
|-------------------|----------------------|----------------------------------------------------|-------------------------------|
| <b>Read codes</b> |                      |                                                    |                               |
| Symptom           | 1B1A.12              | memory loss symptom                                |                               |
|                   | F110.00              | alzheimer's disease                                |                               |
|                   | Eu00.00              | [x]dementia in alzheimer's disease                 |                               |
|                   | Eu02z00              | [x] unspecified dementia                           |                               |
|                   | 28G..00              | forgetful                                          |                               |
|                   | Eu00100              | [x]dementia in alzheimer's disease with late onset |                               |
|                   | E2A1000              | mild memory disturbance                            |                               |
|                   | E00z.00              | senile or presenile psychoses nos                  |                               |
|                   | 1B1A.13              | memory disturbance                                 |                               |
|                   | Z7CF800              | poor short-term memory                             |                               |
|                   | Z7C1.00              | impaired cognition                                 |                               |
|                   | R009.00              | [d]confusion                                       |                               |
|                   | Eu00z11              | [x]alzheimer's dementia unspec                     |                               |
|                   | Eu05700              | [X]Mild cognitive disorder                         |                               |
|                   | 2841.00              | Confused                                           |                               |
|                   | 2841.11              | Confusion                                          |                               |
|                   | 1461.00              | H/O: dementia                                      |                               |
|                   | 168..14              | C/O 'Muzzy head'                                   |                               |
|                   | 1JA2.00              | Suspected dementia                                 |                               |
|                   | 28E..00              | Cognitive decline                                  |                               |
|                   | 28H..00              | Mentally vague                                     |                               |
|                   | E00..11              | Senile dementia                                    |                               |
|                   | E00..12              | Senile/presenile dementia                          |                               |
|                   | Eu01y00              | [X]Other vascular dementia                         |                               |
|                   | Eu02500              | [X]Lewy body dementia                              |                               |
|                   | F116.00              | Lewy body disease                                  |                               |
|                   | R00z011              | [D]Memory deficit                                  |                               |
|                   | Z7CEH14              | Memory problem                                     |                               |
|                   | Cognitive assessment | 9N1T.00                                            | seen in psychiatry clinic     |
|                   |                      | 388m.00                                            | mini-mental state examination |
| 388V.00           |                      | mini mental state score                            |                               |
| 6AB..00           |                      | dementia annual review                             |                               |
| 9N1M.00           |                      | seen in psychology clinic                          |                               |
| ZL9D.00           |                      | seen by psychiatrist                               |                               |
| 9Nk1.00           |                      | seen in memory clinic                              |                               |

| Category          | Diagnosis code | Description                                          |
|-------------------|----------------|------------------------------------------------------|
|                   | 3AD3.00        | six item cognitive impairment test                   |
|                   | 9Nk6.00        | seen in mental health clinic                         |
|                   | 6A6..00        | mental health review                                 |
|                   | 388m.11        | mmse score                                           |
|                   | 9N1R.00        | seen in neurology clinic                             |
|                   | ZRaA.00        | mini-mental state examination                        |
|                   | 9N2a.11        | Seen by CPN                                          |
|                   | ZL9D412        | Seen by old age psychiatrist                         |
|                   | ZQ3E.00        | Mental health assessment                             |
|                   | 3A...11        | Memory assessment                                    |
|                   | 8CM2.00        | Psychiatry care plan                                 |
|                   | ZL9D400        | Seen by psychogeriatrician                           |
|                   | 38C1000        | Assessment for dementia                              |
|                   | 38Dv.00        | GPCOG - general practitioner assessment of cognition |
|                   | 3A...12        | Dementia assessment                                  |
|                   | 3AF..00        | Addenbrooke's cognitive examination revised          |
|                   | 66h..00        | Dementia monitoring                                  |
|                   | 8A2..00        | Psychiatric monitoring                               |
|                   | 8CMZ.00        | Dementia care plan                                   |
|                   | 8HLC.00        | Psychogeriatric D.V. done                            |
|                   | 9N1yA00        | Seen in psychogeriatric clinic                       |
|                   | 9NN7.00        | Under care of mental health team                     |
|                   | ZLA2E00        | Seen by psychiatric nurse                            |
|                   | ZLA3111        | Seen by CPN                                          |
|                   | ZLB5.00        | Seen by mental health counsellor                     |
| Relevant referral | 8H4D.00        | Referral to psychogeriatrician                       |
|                   | 8H47.00        | Geriatric referral                                   |
|                   | 8HKC.00        | Psychogeriatrics D.V. requestd                       |
|                   | 8HTY.00        | Referral to memory clinic                            |
|                   | 8Hc..00        | Referral to mental health team                       |
|                   | 8H49.00        | Psychiatric referral                                 |
|                   | 8HHo.00        | Referral to older age community mental health team   |
|                   | ZL5B.00        | Referral to psychiatrist                             |
| Encounter         | 9N1C.11        | Home visit                                           |
|                   | 9N33.11        | Letter encounter                                     |
|                   | 9N33.00        | Letter encounter from patient                        |
|                   | 9N35.00        | Letter encounter to patient                          |
|                   | 9N36.11        | Letter from consultant                               |
|                   | 9N36.00        | Letter from specialist                               |
|                   | 8H87.00        | Follow-up 1 month                                    |

1  
2  
3  
4  
5  
6  
7  
8  
9  
10  
11  
12  
13  
14  
15  
16  
17  
18  
19  
20  
21  
22  
23  
24  
25  
26  
27  
28  
29  
30  
31  
32  
33  
34  
35  
36  
37  
38  
39  
40  
41  
42  
43  
44  
45  
46  
47  
48  
49  
50  
51  
52  
53  
54  
55  
56  
57  
58  
59  
60

| Category       | Diagnosis code | Description                           |
|----------------|----------------|---------------------------------------|
|                | 9NV..00        | Follow-up encounter                   |
|                | 9N32.00        | Third party encounter                 |
|                | 6A...00        | Patient reviewed                      |
|                | 9N3D.00        | Letter received                       |
|                | 2....11        | Examination of patient                |
|                | 9H...00        | Mental health administration          |
|                | ZL9AL00        | Seen by care of the elderly physician |
|                | 68Q..00        | Geriatric screening                   |
|                | 69D1.00        | Geriatric health exam.                |
|                | 9N1U.00        | Seen in elderly assessment clinic     |
|                | 9Nk5.00        | Seen in elderly care clinic           |
|                | 3876.00        | Multidisciplinary assessment          |
|                | 3891.00        | Initial patient assessment            |
|                | 3Z...00        | Diagnostic procedure NOS              |
|                | 67...11        | Counselling                           |
|                | 671C.00        | Discussed with doctor                 |
|                | 68P..00        | Adult screening                       |
|                | 68Q3.00        | Geriatric 75 year screen              |
|                | 9N02.00        | Seen in geriatric clinic              |
|                | 9N0c.00        | Seen in private clinic                |
|                | 9N11.00        | Seen in GP's surgery                  |
|                | 9N1C.00        | Seen in own home                      |
|                | 9N22.00        | Seen by practice nurse                |
|                | 9N2G.00        | Seen by consultant                    |
|                | 9N2N.00        | Seen by Rota Doctor                   |
|                | 9N2R.00        | Seen by co-operative doctor           |
|                | 9N2o.00        | Seen by health support worker         |
|                | 9N7..11        | Follow-up consultation                |
|                | 9NFA.00        | District nurse visit                  |
|                | 9NY..00        | Appointment                           |
|                | 9Na..00        | Consultation                          |
|                | ZL23300        | Under care of district nurse          |
|                | ZV67.00        | [V]Follow-up examination              |
| Other referral | 8HR1.00        | Refer for ECG recording               |
|                | 8H7Y.00        | Refer to acupuncture                  |
|                | 8H77.00        | Refer to physiotherapist              |
|                | 8H...00        | Referral for further care             |
|                | 8H68.00        | Referral to haematologist             |
|                | 8HTb.00        | Referral to male urology clinic       |
|                | 8H7..12        | Referral to nurse                     |
|                | 8H4J.00        | Referred to anaesthetist              |

| Category            | Diagnosis code | Description                                                                          |
|---------------------|----------------|--------------------------------------------------------------------------------------|
|                     | 8H4K.00        | Referred to endocrinologist                                                          |
|                     | 8H52.00        | Ophthalmological referral                                                            |
|                     | 8H53.00        | ENT referral                                                                         |
|                     | 8H54.00        | Orthopaedic referral                                                                 |
|                     | 8H43.00        | Dermatological referral                                                              |
|                     | 8H7R.00        | Refer to chiropodist                                                                 |
|                     | 8H48.00        | Gastroenterological referral                                                         |
|                     | 8H4L.00        | Referred to nephrologist                                                             |
|                     | 8H58.00        | Gynaecological referral                                                              |
|                     | 8H59.00        | Referred to plastic surgeon                                                          |
|                     | 8H5B.00        | Referred to urologist                                                                |
|                     | 8H5D.00        | Referred to vascular surgeon                                                         |
|                     | 8H5J.00        | Referral to colorectal surgeon                                                       |
|                     | 8H72.00        | Refer to district nurse                                                              |
|                     | 8H7G.00        | Refer to speech therapist                                                            |
|                     | 8H7Q.00        | Refer to surgical fitter                                                             |
|                     | 8H7V.00        | Refer to audiologist                                                                 |
|                     | 8H7X.00        | Refer to podiatry                                                                    |
|                     | 8HBJ.00        | Stroke / transient ischaemic attack referral                                         |
|                     | 8HD..00        | Refer to hospital OPD                                                                |
|                     | 8HH5.00        | Refer to domiciliary physiotherapy                                                   |
|                     | 8HHk.00        | Referral to hospital phlebotomist                                                    |
|                     | 8HHl.00        | Referral to practice phlebotomist                                                    |
|                     | 8HQ..00        | Refer for imaging                                                                    |
|                     | 8HQ2.00        | Refer for ultrasound investign                                                       |
|                     | 8HQ8.00        | Referral for dual energy X-ray photon absorptiometry scan                            |
|                     | 8HR8.00        | Referral for 24 hour blood pressure recording                                        |
|                     | 8HTX.00        | Referral to incontinence clinic                                                      |
|                     | 8HVQ.00        | Private referral to rheumatologist                                                   |
|                     | 8He..00        | Referral to intermediate care                                                        |
|                     | 8He0.00        | Referral to intermediate care - hospital at home                                     |
|                     | 8Hj0.00        | Referral to diabetes structured education programme                                  |
|                     | ZL85111        | Referral to community physiotherapist                                                |
| Diagnosis           | F110.00        | alzheimer's disease                                                                  |
|                     | Eu00.00        | [x]dementia in alzheimer's disease                                                   |
|                     | Eu00100        | [x]dementia in alzheimer's disease with late onset                                   |
|                     | Eu00z11        | [x]alzheimer's dementia unspec                                                       |
| <b>ICD-10 codes</b> |                |                                                                                      |
| Symptom             | F03            | unspecified dementia                                                                 |
|                     | R418           | other and unspecified symptoms and signs involving cognitive functions and awareness |

| <b>Category</b>                  | <b>Diagnosis code</b> | <b>Description</b>                                        |
|----------------------------------|-----------------------|-----------------------------------------------------------|
|                                  | R54                   | senility                                                  |
|                                  | G309                  | Alzheimer's disease, unspecified                          |
|                                  | G309D                 | Alzheimer's disease, unspecified                          |
|                                  | R410                  | Disorientation, unspecified                               |
|                                  | F051                  | Delirium superimposed on dementia                         |
|                                  | F028                  | Dementia in other specified diseases classified elsewhere |
|                                  | F067                  | Mild cognitive disorder                                   |
|                                  | F99                   | Mental disorder, not otherwise specified                  |
| Cognitive assessment - Encounter | Z139                  | Special screening examination, unspecified                |
| Diagnosis                        | G309                  | Alzheimer's disease, unspecified                          |
|                                  | G309D                 | Alzheimer's disease, unspecified                          |

**Appendix Figure 1: Cognitive impairment and cognitive assessment relative to AD diagnosis**

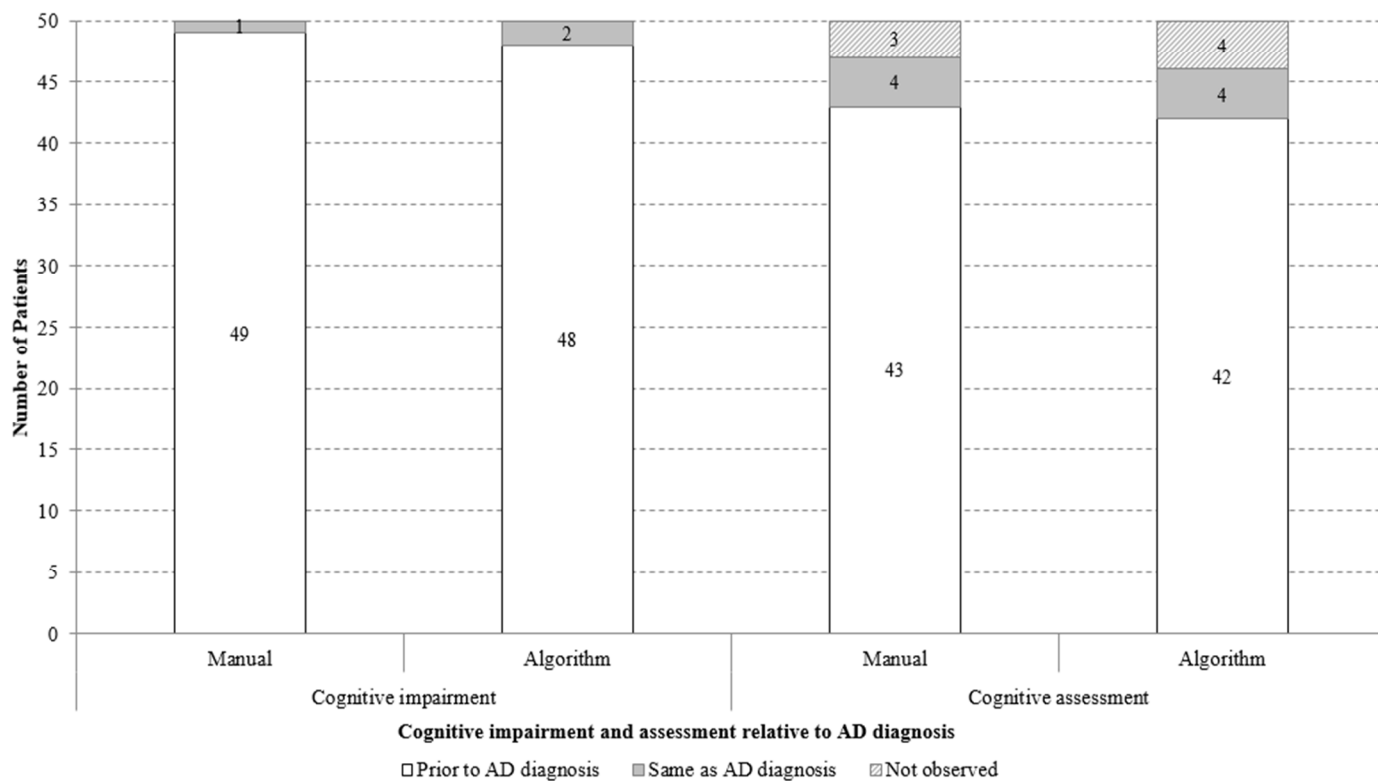

**Abbreviation:** AD = Alzheimer's disease

**Note:**

Manual review included the review of both structured data and text-based data

# BMJ Open

## Reliability of Coded Data to Identify Earliest Indications of Cognitive Decline, Cognitive Evaluation, and Alzheimer's Disease Diagnosis: A Pilot Study in England

|                                 |                                                                                                                                                                                                                                                                                                                                                                                                                                                                                  |
|---------------------------------|----------------------------------------------------------------------------------------------------------------------------------------------------------------------------------------------------------------------------------------------------------------------------------------------------------------------------------------------------------------------------------------------------------------------------------------------------------------------------------|
| Journal:                        | <i>BMJ Open</i>                                                                                                                                                                                                                                                                                                                                                                                                                                                                  |
| Manuscript ID                   | bmjopen-2017-019684.R1                                                                                                                                                                                                                                                                                                                                                                                                                                                           |
| Article Type:                   | Research                                                                                                                                                                                                                                                                                                                                                                                                                                                                         |
| Date Submitted by the Author:   | 22-Jan-2018                                                                                                                                                                                                                                                                                                                                                                                                                                                                      |
| Complete List of Authors:       | Dell'Agnello, Grazia; Eli Lilly Italia SpA<br>Desai, Urvi; Analysis Group, Inc.,<br>Kirson, Noam; Analysis Group, Inc.<br>Wen, Jody; Analysis Group, Inc.<br>Meiselbach, Mark; Analysis Group, Inc.<br>Reed, Catherine; Eli Lilly and Company (Lilly UK)<br>Belger, Mark; Eli Lilly and Company (Lilly UK)<br>Lenox-Smith, Alan; Eli Lilly and Company (Lilly UK)<br>Martinez, Carlos; Institute for Epidemiology, Statistics and Informatics GmbH<br>Rasmussen, Jill; psi-napse |
| <b>Primary Subject Heading</b>: | Research methods                                                                                                                                                                                                                                                                                                                                                                                                                                                                 |
| Secondary Subject Heading:      | Medical management, Mental health, Health services research                                                                                                                                                                                                                                                                                                                                                                                                                      |
| Keywords:                       | Clinical Practice Research Datalink, medical coding, text-based data, Alzheimer's disease                                                                                                                                                                                                                                                                                                                                                                                        |
|                                 |                                                                                                                                                                                                                                                                                                                                                                                                                                                                                  |

SCHOLARONE™  
Manuscripts

1  
2  
3 **Reliability of Coded Data to Identify Earliest Indications of Cognitive Decline, Cognitive**  
4 **Evaluation, and Alzheimer's disease Diagnosis: A Pilot Study in England**  
5  
6

7 **Authors:**

8 Grazia Dell'Agnello, PhD<sup>1</sup>; Urvi Desai, PhD<sup>2</sup>; Noam Y. Kirson, PhD<sup>2</sup>; Jody Wen, BS<sup>2</sup>; Mark K  
9 Meiselbach, BS<sup>2</sup>; Catherine C Reed, PhD<sup>3</sup>; Mark Belger, BSc<sup>3</sup>; Alan Lenox-Smith, MBBS,  
10 FFPM, FRCP<sup>4</sup>; Carlos Martinez, MD<sup>5</sup>; Jill Rasmussen, MBChB, FRCGP, FFPM<sup>6</sup>  
11  
12

13  
14 **Affiliations:**

15 <sup>1</sup> Eli Lilly Italia SpA, 50019 Sesto Fiorentino (FI), Italy

16  
17 <sup>2</sup> Analysis Group, Inc., 111 Huntington Ave, 14th floor, Boston, MA 02199

18  
19 <sup>3</sup> Eli Lilly and Company (Lilly UK), Windlesham, Surrey, UK

20  
21 <sup>4</sup> Eli Lilly and Company (Lilly UK), Priestley Road, Basingstoke, UK

22  
23 <sup>5</sup> Institute for Epidemiology, Statistics and Informatics GmbH, Frankfurt, Germany

24  
25 <sup>6</sup> psi-napse, Dorking, Surrey, UK  
26  
27  
28  
29  
30

31 **Corresponding Author:**

32 Urvi Desai, PhD

33  
34 Analysis Group, Inc., 111 Huntington Avenue, 14<sup>th</sup> floor, Boston, MA 02199

35  
36 Phone: (617)425-8315

37  
38 Fax number: (617)425-8001

39  
40 Email: [urvi.desai@analysisgroup.com](mailto:urvi.desai@analysisgroup.com)  
41  
42  
43  
44  
45  
46

47 **Word Count:** 3,753 (not including abstract, summary of strengths and limitations, ethics  
48 statement, data availability, competing interests, funding, author contributions, and references).  
49

50 **Exhibits:** 5 for the main document, 2 for Appendix  
51  
52  
53  
54  
55  
56  
57  
58  
59  
60



## Abstract (300/300 Words; including section headers)

**Objectives:** Evaluate the reliability of using diagnosis codes and prescription data to identify timing of symptomatic onset, cognitive assessment, and diagnosis of Alzheimer's disease (AD) among patients diagnosed with AD.

**Methods:** This was a retrospective cohort study using the UK Clinical Practice Datalink (CPRD). The study cohort consisted of a random sample of 50 patients with first AD diagnosis in 2010-2013. Additionally, patients were required to have a valid text-field code and a hospital episode or a referral in the 3 years before the first AD diagnosis. The earliest indications of cognitive impairment, cognitive assessment, and AD diagnosis were identified using two approaches: 1) using an algorithm based on diagnostic codes and prescription drug information, 2) using information compiled from manual review of both text-based and coded data. The reliability of the code-based algorithm for identifying the earliest dates of the three measures described earlier was evaluated relative to the comprehensive second approach. Additionally, common cognitive assessments (with and without results) were described for both approaches.

**Results:** The two approaches identified the same first dates of cognitive symptoms in 33 (66%) of the 50 patients, first cognitive assessment in 29 (58%) patients, and first AD diagnosis in 43 (86%) patients. Allowing for the dates from the two approaches to be within 30 days, the code-based algorithm's success rates increased to 74%, 70%, and 94%, respectively. Mini Mental State Examination (MMSE) was the most commonly observed cognitive assessment in both approaches, however of the 53 tests performed, only 19 results were observed in the coded data.

**Conclusions:** The code-based algorithm shows promise for identifying the first AD diagnosis. However, the reliability of using coded data to identify earliest indications of cognitive

1  
2  
3 impairment and cognitive assessments is questionable. Additionally, CPRD is not a  
4  
5 recommended data source to identify results of cognitive assessments.  
6  
7

8 **Keywords:** Clinical Practice Research Datalink, medical coding, text-based data, Alzheimer's  
9  
10 disease  
11  
12  
13  
14  
15  
16  
17  
18  
19  
20  
21  
22  
23  
24  
25  
26  
27  
28  
29  
30  
31  
32  
33  
34  
35  
36  
37  
38  
39  
40  
41  
42  
43  
44  
45  
46  
47  
48  
49  
50  
51  
52  
53  
54  
55  
56  
57  
58  
59  
60

For peer review only

## Summary of strengths and limitations

- Using enriched data elements from both structured data fields and physician notes, this study not only identified relevant medical codes and prescriptions related to timing of onset of cognitive symptoms, cognitive assessments, and AD diagnosis, but also captured an additional marker of cognitive assessment based on sequencing of clinical interactions.
- The study findings also provide important insight into the availability of results from cognitive assessments from both physician notes and coded data.
- However, the study relies on Read codes and ICD-10 codes, which do not contain information by which to confirm clinical diagnoses, severity of illness, or physician interpretation, and does not include data from memory clinics, a key setting in which cognitive assessments are conducted in England.
- Additionally, the study focuses on patients with AD who had no evidence of other dementia etiologies.
- Finally, the study utilizes data prior to 2014, so study findings may not reflect the current practices in management of patients with dementia in England.

## Background

The Alzheimer's Society of the UK estimates that approximately 1% of the entire UK population currently has some form of dementia.<sup>1</sup> Alzheimer's disease (AD) is the most common cause of dementia and accounts for approximately 62% of all dementias in the UK. The pathophysiological changes underlying AD may develop well before a formal diagnosis, resulting in early symptoms of cognitive impairment such as memory loss, attention deficits, impaired reasoning, poor judgment, and confusion prior to the diagnosis.<sup>2,3,4,5</sup>

The diagnosis of AD can be challenging, and requires assessment of multiple domains related to patients' cognition and function.<sup>6</sup> Some guidelines suggest evaluation of behavioral symptoms as well.<sup>7</sup> Recent policy efforts in England have aimed to improve diagnosis rate and management of dementia,<sup>8</sup> as earlier, more accurate evaluation and diagnosis is believed to be important to improving potential health outcomes for patients and their caregivers as well as reduce the burden associated with dementia.<sup>9</sup> Information about use of and results from various evaluation tools – including tools for initial assessment (mainly in the primary care setting) such as the General Practitioner Assessment of Cognition (GPCOG), the Abbreviated Mental Test Score (AMTS), Six-Item Cognitive Impairment Test (6CIT), and those used to inform a diagnosis (mainly in the secondary care settings) such as the Addenbrooke's Cognitive Assessment-Revised (ACE-R), Mini mental state examination (MMSE) and Montreal Cognitive Assessment (MOCA)<sup>10,11</sup> – can provide important insight regarding practice patterns during the screening and diagnostic process as well as severity of symptoms of cognitive impairment. However, this information may often not be captured in existing, structured, real-world data sources used to conduct observational studies.<sup>12</sup> In addition, early symptoms associated with cognitive decline, such as mild memory impairment, might only be noted in free text fields that summarize

1  
2  
3 physicians' notes and/or correspondence provided by specialists evaluating these patients in  
4  
5 secondary care settings. These supplemental data elements are generally not available to  
6  
7 researchers,<sup>12</sup> which limits the ability to identify the timing of onset of symptoms and subsequent  
8  
9 cognitive testing.  
10

11  
12 In addition, to the best of our knowledge, no study to date has evaluated whether the  
13  
14 information captured within these supplemental text data fields provides any additional insight  
15  
16 over the coded data (e.g., diagnosis codes) into the timing of onset of cognitive impairment  
17  
18 symptoms and subsequent testing among patients eventually diagnosed with AD. Previous  
19  
20 studies assessing the reliability of coded data (including but not limited to dementia diagnoses)  
21  
22 typically relied on reviews of medical records, physician surveys, and comparisons to other data  
23  
24 sources.<sup>13</sup> The objective of the present exploratory study was to assess the reliability of using a  
25  
26 code-based algorithm to identify the timing of symptomatic onset, cognitive assessment  
27  
28 (including initial screening), and formal diagnosis of AD, as compared to the combination of  
29  
30 codes and supplemental, non-structured physicians' notes and secondary care correspondence,  
31  
32 among patients diagnosed with AD. An additional objective was to compare the availability of  
33  
34 results from the cognitive assessments prior to AD diagnosis between the structured data and the  
35  
36 anonymized text data.  
37  
38  
39  
40  
41

## 42 **Methods**

### 43 **Data**

44  
45 The study was conducted using a subset of the UK Clinical Practice Research Datalink  
46  
47 (CPRD), which includes longitudinal observational data from general practitioner (GP)  
48  
49 electronic health record systems in primary care practices, including medical diagnoses (using  
50  
51 Read codes), referrals to specialists and to secondary care, testing and interventional procedures  
52  
53  
54  
55  
56  
57  
58  
59  
60

1  
2  
3 conducted in primary care, lifestyle information (e.g., smoking, exercise), and drugs prescribed  
4  
5 in primary care.<sup>12</sup> The subset consisted of patients in the CPRD with a link to hospitalizations  
6  
7 and outpatient encounters in the Hospital Episode Statistics (HES) dataset.  
8  
9

10 Until recently (May 2015), the CPRD database also included pseudo-anonymized text  
11  
12 fields summarizing notes entered by the GP or providers during consultations, which were made  
13  
14 available to researchers upon special request.<sup>13</sup> In addition, it is possible to request de-identified  
15  
16 secondary care correspondence received by the GPs. These correspondences provide  
17  
18 supplemental information regarding the patient's encounters in secondary care settings such as  
19  
20 hospitals.  
21  
22

### 23 **Sample selection**

24  
25  
26 The population for this pilot study was selected in two steps. In Step 1, a cohort of  
27  
28 patients with earliest indication of AD in 2010-2013, who were eligible for linkage to HES and  
29  
30 were continuously enrolled in active CPRD practice for  $\geq 12$  months before the first AD  
31  
32 diagnosis, were selected. Indication of AD was defined as the first Read code or ICD-10 code for  
33  
34 AD (see Appendix Table 1 for details). Patients were required to have no records with diagnosis  
35  
36 of other types of dementia (e.g., vascular dementia) between or after the two most recent records  
37  
38 indicating AD.  
39  
40  
41

42 In order to ensure that the cohort of patients with AD had at least one encounter where all  
43  
44 data elements, including physician notes and correspondence from secondary care settings, may  
45  
46 be available, all patients were required to have  $\geq 1$  consultation record with a non-missing, non-  
47  
48 zero text identifier and  $\geq 1$  HES record or  $\geq 1$  referral record indicating a visit to a specialist (e.g.,  
49  
50 psychiatrist, neurologist, geriatrician) in the three years prior to the first AD diagnosis.  
51  
52  
53  
54  
55  
56  
57  
58  
59  
60

1  
2  
3 To facilitate detailed examination of linked free text information, a sample of 50 patients  
4 was randomly drawn (using a computer-generated randomization algorithm) from the cohort  
5 meeting the criteria in Step 1 for further analysis. In particular, using the SAS software (SAS  
6 Institute, Cary, NC), all patients were assigned a random number. Following this, the first 50  
7 patients with the smallest values for the randomly assigned numbers were selected from the  
8 dataset. A random sampling approach was used to increase the likelihood that the sub-sample  
9 selected was representative of the overall cohort identified in Step 1.  
10  
11  
12  
13  
14  
15  
16  
17  
18

### 19 **Development of the code-based algorithm**

20  
21  
22 Earliest indications of symptoms of cognitive decline (e.g., “memory loss symptom”),  
23 cognitive assessment (for either screening or diagnosis), and AD diagnosis were identified using  
24 two parallel approaches. In the first approach, the Read codes, ICD-10 codes, and prescription  
25 medications indicated to treat AD (i.e., cholinesterase inhibitors and memantine) found in the  
26 structured part of CPRD from up to 3 years prior to the AD diagnosis were reviewed and  
27 categorized into an algorithm to establish first observed dates of the three key time points in the  
28 pathway of progression from onset of symptoms to AD diagnosis.  
29  
30  
31  
32  
33  
34  
35  
36  
37

38 In the second approach, in addition to the diagnosis codes, a targeted search of the  
39 pseudo-anonymised text data and additional correspondence provided by the GPs was conducted  
40 to identify key phrases suggestive of the earliest markers of symptoms related to cognitive  
41 impairment (e.g., “memory loss”, “cognitive impairment”, “confusion”, etc., and their variants),  
42 cognitive assessments (e.g., “GPCOG”, “MMSE”, “MOCA”, “mini-mental”, etc., and their  
43 variants) and AD diagnosis (see Appendix Table 2 for a list of all phrases identified from this  
44 process). The targeted search was conducted by two independent reviewers to account for any  
45 subjective interpretation of the free-text.  
46  
47  
48  
49  
50  
51  
52  
53  
54  
55  
56  
57  
58  
59  
60

1  
2  
3 Based on preliminary data inspection and the combined manual review of the text and  
4 structured data for 15 of the 50 patients, the definition of cognitive assessment using the  
5 structured data was refined to include an additional marker based on referrals. Specifically, given  
6 that clinical evaluation for dementia is usually undertaken by secondary care mental health  
7 specialists (e.g., geriatricians, old age psychiatrists, neurologists)<sup>14</sup> several weeks after the initial  
8 referral,<sup>8</sup> it was determined that a combination of codes indicating referral to a specialist and a  
9 letter from specialist within 3 months after the referral could be considered as indication of  
10 cognitive assessment. In addition, it was assumed that the earliest indication of cognitive  
11 assessment could not precede the earliest symptom of cognitive impairment.  
12  
13  
14  
15  
16  
17  
18  
19  
20  
21  
22

23  
24 Appendix Table 3 describes the final code-based algorithm used for quality evaluation.  
25

### 26 **Quality evaluation of the reliability of the code-based algorithm**

27

28 The findings from the two approaches were compared to quantify the differences in dates  
29 for the first indicators of cognitive/functional symptoms, assessments, and AD diagnosis as  
30 identified by the code-based algorithm and manual review. Additionally, the percent of patients  
31 for whom the dates of each of the three measures (indicator for cognitive impairment symptoms,  
32 cognitive assessments, and AD diagnosis) identified by the code-based algorithm were after the  
33 dates suggested by the second approach (suggesting the code-based algorithm was less sensitive)  
34 were calculated. Similarly, the proportions of patients for whom the dates of the three measures  
35 as identified by the code-based algorithm were before the dates identified by the second  
36 approach (suggesting the code-based algorithm was more sensitive) were reported. While exact  
37 matches were preferred for all analyses, in order to account for delays between the receipt of a  
38 letter from the specialist assessing the patient and the corresponding coding of the information in  
39 CPRD, a similar metric allowing for a 30-day gap between the dates identified by the two  
40  
41  
42  
43  
44  
45  
46  
47  
48  
49  
50  
51  
52  
53  
54  
55  
56  
57  
58  
59  
60



1  
2  
3 approaches was also measured. Note that for the purpose of the analysis, if an event was not  
4  
5 observed for both approaches, it was considered an exact match. However, if a date was  
6  
7 identified only in the manual review and not in the code-based algorithm, then the code-based  
8  
9 algorithm was considered less sensitive. Similarly, if a date was identified in the code-based  
10  
11 algorithm but not in manual review, the code-based algorithm was considered more sensitive.  
12  
13

14  
15 Additionally, the days between the dates of first symptom of cognitive impairment and  
16  
17 first cognitive assessment, and between the first cognitive assessment and the first AD diagnosis  
18  
19 were compared for the two approaches. Congruence between the two data sources with regards  
20  
21 to recording the type of and results from the specific type of the cognitive assessments performed  
22  
23 prior to AD diagnosis was described.  
24  
25

26 The study approach is illustrated in Appendix Figure 1.  
27

## 28 **Results**

### 29 **Sample characteristics**

30  
31 Overall, 18,281 patients in the CPRD had an indication of AD (based on diagnosis codes  
32  
33 or AD-related medications) in 2010-2013 (See Figure 1). Of these, 12,252 (67%) patients had  
34  
35 their first indication of AD in 2010-2013; 11,151 had no indications of another type of dementia  
36  
37 between or after AD diagnoses. Of these 11,151 patients, 4,515 (40%) patients had evidence of  
38  
39 both text-field data and receipt of care in secondary settings in the 3 years prior to the first AD  
40  
41 diagnosis. The final sample comprised 1,937 patients who met all the inclusion and exclusion  
42  
43 criteria (mean age 82 years, 38% males). The random sample of 50 patients (selected from the  
44  
45 1,937 patients meeting all selection criteria) included in additional analyses had similar  
46  
47 demographic characteristics as the 1,937 patients (mean age 82 years, 42% males). These 50  
48  
49  
50  
51  
52  
53  
54  
55  
56  
57  
58  
59  
60

1  
2  
3 patients had a total of 2,051 records with valid pseudo-anonymized text field data and 44  
4  
5 correspondences from secondary care, provided by CPRD upon request.  
6

### 7 **Comparison of findings from the two approaches**

8  
9  
10 Of the 50 patients included in the sample, the code-based algorithm identified 48 patients  
11 with evidence of cognitive impairment prior to AD diagnosis and 42 with evidence of cognitive  
12 assessment prior to AD diagnosis. An additional 2 and 4 patients respectively had evidence of  
13 assessment prior to AD diagnosis. An additional 2 and 4 patients respectively had evidence of  
14 cognitive impairment and cognitive assessment on the same date as the AD diagnosis. The  
15 remaining 4 patients had no record of cognitive assessment prior to or on the same date as the  
16 AD diagnosis (Appendix Figure 2). For the second, comprehensive approach which utilized  
17 information from all available data elements including text-based data, the number of patients  
18 with cognitive impairment and cognitive assessments prior to AD diagnosis were 49 and 43  
19 respectively, and the numbers of patients with the same dates for these metrics as the AD  
20 diagnosis were 1 and 4 respectively. No record of cognitive assessment was observed prior to or  
21 on the same date as the AD diagnosis for 3 patients (Appendix Figure 2).  
22  
23  
24  
25  
26  
27  
28  
29  
30  
31  
32  
33  
34

35 With regards to the timing of the three key events, relative to the second approach, the  
36 code-based algorithm was able to identify exact matches for the first date of symptoms  
37 associated with cognitive impairment in 33 (66%) of the 50 patients, first cognitive assessment in  
38 29 (58%) patients, and first AD diagnosis in 43 (86%) patients (Table 1). Allowing for matches  
39 within 30 days, the algorithm's success rates increased to 74%, 70%, and 94%, respectively, for  
40 the dates of first cognitive impairment symptom, first cognitive assessment, and first AD  
41 diagnosis. For most of the remaining patients, the dates detected by the code-based algorithm  
42 were several days after the dates detected by the more comprehensive approach. There was only  
43 1 patient (2% of the sample), for whom, the date of first symptoms of cognitive impairment  
44  
45  
46  
47  
48  
49  
50  
51  
52  
53  
54  
55  
56  
57  
58  
59  
60

identified by the algorithm was earlier than the date identified by the second, comprehensive approach, suggesting the algorithm was more sensitive. The results were similar even after allowing for a 30-day gap in the dates identified by the two approaches. With respect to identifying the dates of first cognitive assessment the code-based algorithm was found to be more sensitive than the comprehensive approach in 8 patients (16%) based on exact matches and 4 patients (8%) allowing for matches within 30 days. The differences in the detection of the first date of AD diagnosis between the code-based algorithm and manual review based on either exact matches or matches within 30 days were very small.

**Table 1: Differences in dates of earliest indications of cognitive impairment, cognitive assessment, and AD diagnosis as identified by coded-data vs. comprehensive data review (N=50)**

|                                                                      | First symptom | First cognitive assessment | AD diagnosis |
|----------------------------------------------------------------------|---------------|----------------------------|--------------|
| <b>Date matches with manual review, n (%)</b>                        |               |                            |              |
| Exact matches                                                        | 33 (66.0%)    | 29 (58.0%)                 | 43 (86.0%)   |
| Matches $\pm$ 30 days                                                | 37 (74.0%)    | 35 (70.0%)                 | 47 (94.0%)   |
| <b>Characteristics of mismatches, n (%)</b>                          |               |                            |              |
| Code-based algorithm more sensitive than manual review               | 1 (2.0%)      | 8 (16.0%)                  | 0 (0.0%)     |
| Code-based algorithm more sensitive than manual review (< -30 days)  | 1 (2.0%)      | 4 (8.0%)                   | 0 (0.0%)     |
| Code-based algorithm less sensitive than manual review               | 16 (32.0%)    | 13 (26.0%)                 | 7 (14.0%)    |
| Code-based algorithm less sensitive than manual review (> + 30 days) | 12 (24.0%)    | 11 (22.0%)                 | 3 (6.0%)     |

**Abbreviation:** AD = Alzheimer's disease

**Notes:**

Manual review included the review of both structured data and text-based data; cases where dates were not observed by either approach (n=2 for cognitive assessment only) were considered exact matches; if the algorithm generated a date value that either preceded the equivalent date in the manual review or for which an equivalent date in the manual review as not observed, it was considered as being more sensitive than the manual review.

1  
2  
3 Additionally, the code-based algorithm and the comprehensive review of all data  
4  
5 elements returned qualitatively similar gaps between the dates of first symptom of cognitive  
6  
7 impairment and first cognitive assessment, and between the first cognitive assessment and the  
8  
9 first AD diagnosis. For both approaches, the median time between first symptom and cognitive  
10  
11 assessment was under 6 weeks (37 days for the manual review and 14 days for the algorithm)  
12  
13 whereas the median time between the first cognitive assessment and the first AD diagnosis was  
14  
15 between 6-7 months (214 days for the manual review and 181 days for the algorithm) (Figures 2  
16  
17 and 3).  
18  
19  
20

21 In terms of the specific types of cognitive assessments performed prior to AD diagnosis,  
22  
23 34 (68%) patients had information available on the type of cognitive assessments conducted.  
24  
25 Among these, very few patients received screening-type evaluations: 3 patients received the  
26  
27 AMTS, 5 patients received the 6CIT, and 1 patient received GPCOG (Table 2). The more  
28  
29 detailed evaluations captured in the data included the ACE-R (5/50 patients) and the MMSE  
30  
31 (30/50 patients; a total of 53 assessments). A total of 9 patients received multiple tests prior to  
32  
33 AD diagnosis, primarily in addition to  $\geq 1$  MMSE assessment (Table 2). For the most commonly  
34  
35 administered cognitive assessment – the MMSE – the results were largely captured only in the  
36  
37 supplemental (text-based) data. Specifically, 38 out of the 53 assessments had valid test scores  
38  
39 available in the text-based data, only 6 of which were available and were consistent in both data  
40  
41 sources. Additional 13 scores were observable only in the structured portion of the data, and  
42  
43 neither data source reported scores for the remaining two assessments.  
44  
45  
46  
47  
48

49 **Table 2: Descriptive characteristics of cognitive assessments in the three years prior to AD**  
50 **diagnosis (N=50)**  
51

| Cognitive testing characteristic | n (%)      |
|----------------------------------|------------|
| Any cognitive test               | 34 (68.0%) |

**Type of cognitive test**

|                                                       |            |
|-------------------------------------------------------|------------|
| General Practitioner Assessment of Cognition (GPCOG)  | 1 (2.9%)   |
| Abbreviated Mental Test Score (AMTS)                  | 3 (8.8%)   |
| Six-item cognitive impairment test (6CIT)             | 5 (14.7%)  |
| Addenbrooke's Cognitive Examination - Revised (ACE-R) | 5 (14.7%)  |
| Mini-mental State Examination (MMSE)                  | 30 (88.2%) |
| Multiple MMSE tests                                   | 14 (46.7%) |
| <b>Multiple tests of different types</b>              | 9 (26.5%)  |
| MMSE + ACE-R                                          | 3 (33.3%)  |
| MMSE + AMT                                            | 2 (22.2%)  |
| MMSE + 6CIT                                           | 2 (22.2%)  |
| 6CIT + GPCOG                                          | 1 (11.1%)  |
| MMSE + ACE-R + AMTS                                   | 1 (11.1%)  |

---

**Abbreviation:** AD = Alzheimer's disease

**Discussion**

The results of this pilot study suggest that the information captured within the supplemental text-based data fields provide increased accuracy over the structured portion of CPRD data regarding the dates of first symptom of cognitive impairment, first cognitive assessment, and first AD diagnosis, among patients diagnosed with AD. The comparison between the code-based algorithm developed in this study and a manual review of a patient's medical history (including structured data, free text, and correspondence from secondary care settings) suggests that the concordance between the two is highest for identifying the timing of the first recorded AD diagnosis, with diminishing effectiveness of the code-based algorithm in identifying the earliest records for symptoms of cognitive impairment and first cognitive assessment, respectively. Additionally, nearly two-thirds of the 50 patients included in the study had records indicative of specific types of cognitive assessments prior to or concomitantly with their AD diagnoses. For the cognitive assessment captured most commonly in the data, the

1  
2  
3 MMSE, the test results were available in the text-based data for 38 of the 53 assessments,  
4  
5 whereas the results for 13 assessments were captured only in the coded data, and the scores for  
6  
7 the remaining 2 assessments were not available in either data source. This suggests that although  
8  
9 the text-based data elements are more likely to capture this information, neither the coded data,  
10  
11 nor the additional information captured in physician notes and secondary care sources provide a  
12  
13 comprehensive view of the detailed results of cognitive assessments. This may in part be due to  
14  
15 the fact that much of the cognitive evaluation in England is done in specialty clinics such as  
16  
17 memory clinics and the detailed data regarding the use of and findings from cognitive  
18  
19 assessments may not be transferred back to the GPs. Even if the information is transferred back,  
20  
21 it may not be entered into the system. However, given the recent initiatives to increase awareness  
22  
23 about recognizing and recording symptoms of cognitive decline within the GP setting in England  
24  
25 (especially in populations at increased risk for dementia),<sup>8,11</sup> and improve care-coordination as  
26  
27 well as documentation across different provider settings,<sup>15,16</sup> the quality and completeness of data  
28  
29 recording are likely to improve in the future, which could increase the reliability of the code-  
30  
31 based algorithm. The improved quality of the recorded data would also facilitate identification of  
32  
33 symptoms of cognitive impairment sooner, and facilitate real-world research into implications of  
34  
35 earlier identification of cognitive impairment on subsequent outcomes in the UK.  
36  
37  
38  
39  
40  
41

### 42 **Study strengths and limitations**

43  
44 The study used data from both the structured portion of CPRD and the text fields  
45  
46 reflecting rich, additional information from notes captured by physicians/specialists during  
47  
48 consultation. Using these enriched data elements, this study developed a code-based algorithm  
49  
50 based on the findings from an intensive manual review process independently conducted by two  
51  
52 reviewers. In doing so, we not only identified relevant medical codes and prescriptions to  
53  
54  
55  
56  
57  
58  
59  
60

1  
2  
3 identify timing of onset of cognitive symptoms, cognitive assessments, and AD diagnosis, but  
4 also captured an additional marker of cognitive assessment based on sequencing of clinical  
5 interactions. In addition, the study provides important insight into the availability of results from  
6 cognitive assessments, in particular MMSE, from both physician notes and coded data.  
7  
8  
9

10  
11  
12 However, this study also has a number of limitations. First, the study relies on the Read  
13 codes (Primary Care) and ICD-10 codes (secondary care) used within the CPRD and HES  
14 administrative records datasets, respectively. These codes are retrieved from electronic health  
15 records and hospital admission records and do not contain information by which to confirm  
16 clinical diagnoses, severity of illness, or physician interpretation. Accordingly, it is possible that  
17 some patients identified as having been diagnosed with AD, with no recorded diagnosis of other  
18 type, have other dementia etiologies instead.<sup>17</sup> Relatedly, the earliest marker of onset of cognitive  
19 symptoms is based on the information captured in the data, and the precise timing of perceived  
20 onset of cognitive impairment is not known. In addition, for this study, though we reviewed the  
21 correspondence from some secondary care interactions, we did not have access to data from  
22 memory clinics, which is a key setting in which cognitive assessments are conducted in England.  
23  
24  
25  
26  
27  
28  
29  
30  
31  
32  
33  
34  
35  
36  
37  
38  
39  
40  
41  
42  
43  
44  
45  
46  
47  
48  
49  
50  
51  
52  
53  
54  
55  
56  
57  
58  
59  
60

Future research should identify avenues to compare the reliability of the algorithm relative to data captured in these settings as well. This study is also limited in sample size, as the algorithm was only developed and assessed for 50 randomly selected patients who were diagnosed with AD. In addition, the algorithm may not capture all Read codes and ICD-10 codes indicative of symptoms of cognitive impairment, cognitive assessment, and AD diagnosis. As such, additional research using larger patient populations is necessary to further test the reliability and generalizability of the algorithm. Furthermore, the study was focused on patients with AD who had no evidence of other dementia etiologies, and further research is needed to assess the

1  
2  
3 reliability of the coded data for identifying the timing of cognitive impairment, cognitive  
4 assessment, and diagnosis among patients with other dementia etiologies. Finally, the study  
5 utilized data prior to 2014 and the study findings may not reflect the current practices in  
6 management of patients with dementia in England.  
7  
8  
9  
10  
11

## 12 **Conclusions**

13  
14 Given the limited expected future availability of free text data and secondary care  
15 correspondence in CPRD, the code-based algorithm developed using data for a small sample of  
16 AD patients shows promise as a reliable alternative for identifying the earliest indications of AD.  
17 However, the reliability of using coded data to identify earliest symptoms of cognitive  
18 impairment as well as indications of cognitive assessments prior to AD diagnosis is limited. The  
19 use of coded data, in its present form, is not recommended for identifying information regarding  
20 the specific types of cognitive assessments performed, the specialty of physicians performing the  
21 assessments or the results associated with those assessments (e.g., to assess disease severity  
22 levels).  
23  
24  
25  
26  
27  
28  
29  
30  
31  
32  
33  
34

## 35 **Ethics approval and consent to participate**

36  
37 This study was approved by the Independent Scientific Advisory committee (ISAC): Protocol #  
38 16\_043R.  
39  
40  
41

## 42 **Availability of data and materials**

43  
44 This study used the Clinical Practice Research Datalink, provided by CPRD. Per the data use  
45 agreement, the datasets supporting the conclusions of this article cannot be made available to  
46 researchers outside of the study team. However, interested readers may request the data directly  
47 from CPRD – see <https://www.cprd.com/researcher/> for more information.  
48  
49  
50  
51  
52  
53  
54  
55  
56  
57  
58  
59  
60



### Competing interests

GD, CCR, MB, and ALS are full-time employees of Eli Lilly and Company. NYK, UD, JW, and MKM are employees of Analysis Group, Inc., a company that received funding from Eli Lilly and Company for this research. CM and JR are consultants to Eli Lilly and Company.

### Funding

This study was funded by Eli Lilly and Company.

### Authors' contributions

NYK, UD, GD, CCR, and MB contributed to the conceptual design and reviewed and discussed the study results. JW and MKM contributed to the conceptual design and performed data analysis. ALS, JR, and CM contributed in the interpretation of study findings. All authors reviewed, edited, and approved the final manuscript.

### References

1. Dementia UK: The full report. Alzheimer's Society. [https://www.alzheimers.org.uk/site/scripts/download\\_info.php?fileID=2323](https://www.alzheimers.org.uk/site/scripts/download_info.php?fileID=2323) Accessed February 6, 2017.
2. Mortimer JA, Borenstein AR, Gosche KM, Snowdon DA. Very Early Detection of Alzheimer Neuropathology and the Role of Brain Reserve in Modifying Its Clinical Expression. *J Geriatr Psychiatry Neurol* 2005;18: 218-223.
3. Jack CR, Knopman DS, Jagust WJ, Shaw LM, Aisen PS, Weiner MW, Petersen RC, Trojanowski JQ. Hypothetical model of dynamic biomarkers of the Alzheimer's pathological cascade. *Lancet Neurol* 2010; 9:119.
4. Peterson RC. Early diagnosis of Alzheimer's disease: Is MCI too late? *Curr Alzheimer Res*. 2009;6(4):324-330.
5. McKhann GM, Knopman DS, Chertkow H, et al. The diagnosis of dementia due to Alzheimer's disease: Recommendations from the National Institute of Aging and the Alzheimer's Association workgroup. *Alzheimer's & Dementia* 2011;1-7.

- 1  
2  
3  
4  
5  
6  
7  
8  
9  
10  
11  
12  
13  
14  
15  
16  
17  
18  
19  
20  
21  
22  
23  
24  
25  
26  
27  
28  
29  
30  
31  
32  
33  
34  
35  
36  
37  
38  
39  
40  
41  
42  
43  
44  
45  
46  
47  
48  
49  
50  
51  
52  
53  
54  
55  
56  
57  
58  
59  
60
6. NHS Choices. Alzheimer's disease diagnosis. <http://www.nhs.uk/Conditions/Alzheimers-disease/Pages/Diagnosis.aspx> Accessed February 6, 2017.
7. National Institutes of Health. National Institutes on Aging. Alzheimer's disease diagnosis. <https://www.nia.nih.gov/alzheimers/topics/diagnosis#how> Accessed February 6, 2017.
8. Government of UK. Prime Minister's challenge on dementia 2020. 2015. <https://www.gov.uk/government/publications/prime-ministers-challenge-on-dementia-2020/prime-ministers-challenge-on-dementia-2020> Accessed February 6, 2017.
9. Dubois B, Padovani A, Scheltens P, et al. Timely Diagnosis for Alzheimer's Disease: A Literature Review on Benefits and Challenges. *J Alzheimers Dis* 2015;49(3):617-631.
10. NHS Department of Health. Dementia revealed: what primary care needs to know. 2014. <https://www.england.nhs.uk/wp-content/uploads/2014/09/dementia-revealed-toolkit.pdf> Accessed February 6, 2017.
11. NHS England. Dementia diagnosis and management: a brief pragmatic resource for general practitioners. 2015. <https://www.england.nhs.uk/wp-content/uploads/2015/01/dementia-diag-mng-ab-pt.pdf> Accessed February 6, 2017.
12. Herrett E, Gallagher AM, Bhaskaran K, et al. Data resource profile: Clinical Practice Research Datalink (CPRD). *Int J Epidemiol*. 2015;44(3):827–836.
13. Khan NF, Harrison SE, Rose PW. Validity of diagnostic coding within the General Practice Reserach Database: a systematic review. *Br J Gen Pract*. 2010 Mar;60 (572):e128-e136.
14. Alzheimer's Society UK. [https://www.alzheimers.org.uk/info/20071/diagnosis/95/assessment\\_process\\_and\\_tests/2](https://www.alzheimers.org.uk/info/20071/diagnosis/95/assessment_process_and_tests/2) Accessed February 6, 2017.
15. The King's Fund. Transforming our healthcare system: ten priorities for commissioners. 2015. [https://www.kingsfund.org.uk/sites/files/kf/field/field\\_publication\\_file/10PrioritiesFinal2.pdf](https://www.kingsfund.org.uk/sites/files/kf/field/field_publication_file/10PrioritiesFinal2.pdf) Accessed February 13, 2017.
16. NHS National Information Board. Personalized health and care 2020: using data and technology to transform outcomes for patients and citizens. 2014. [https://www.gov.uk/government/uploads/system/uploads/attachment\\_data/file/384650/NIB\\_Rep\\_ort.pdf](https://www.gov.uk/government/uploads/system/uploads/attachment_data/file/384650/NIB_Rep_ort.pdf) Accessed February 13, 2017.
17. Happich M, Kirson NY, Desai U, et al. Excess costs associated with possible misdiagnosis of Alzheimer's disease among patients with vascular dementia in a UK CPRD population. *J Alzheimers Dis* 2016;53:171-183.

1  
2  
3 **Figure Captions/Legends**  
4  
5  
6

7 **Figure 1:** Sample selection  
8  
9

10  
11  
12 **Figure 2:** Distribution of days between first cognitive symptom to cognitive assessment: code-  
13 based algorithm vs. comprehensive data review (N=50)  
14

15 □ Manual ■ Algorithm  
16  
17  
18  
19

20  
21 **Figure 3:** Distribution of days between first cognitive assessment to AD diagnosis: code-based  
22 algorithm vs. comprehensive data review (N=50)  
23

24 □ Manual ■ Algorithm  
25  
26  
27  
28  
29  
30  
31  
32  
33  
34  
35  
36  
37  
38  
39  
40  
41  
42  
43  
44  
45  
46  
47  
48  
49  
50  
51  
52  
53  
54  
55  
56  
57  
58  
59  
60

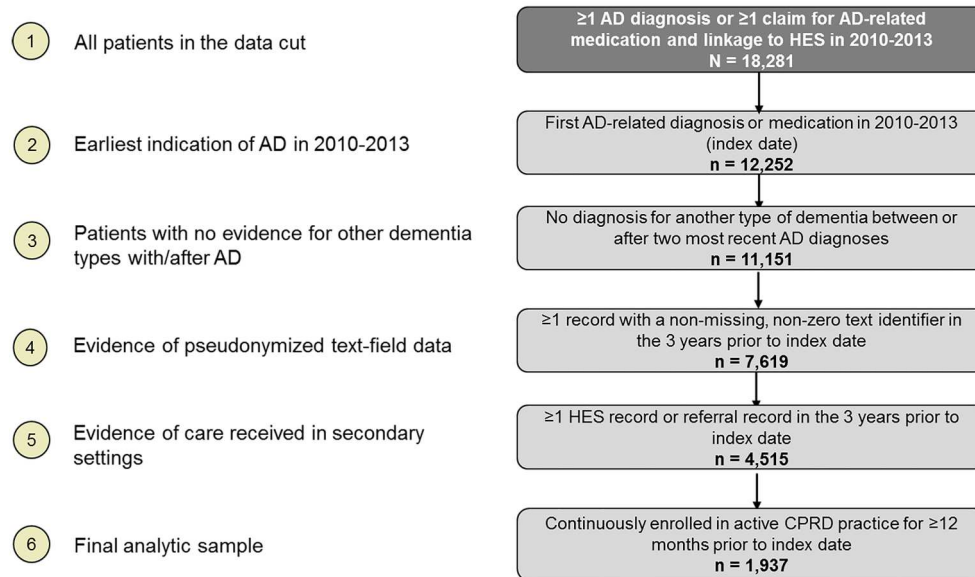

26 **Abbreviations:** AD = Alzheimer's disease, HES = Hospital Episode Statistics, CPRD = Clinical Practice Research  
27 Datalink

28 **Note:**

29 Please refer to Appendix Table 1 for the Read codes and ICD-10 codes used to identify AD and other dementia types.

30  
31  
32 Figure 1: Sample selection

33 282x217mm (300 x 300 DPI)

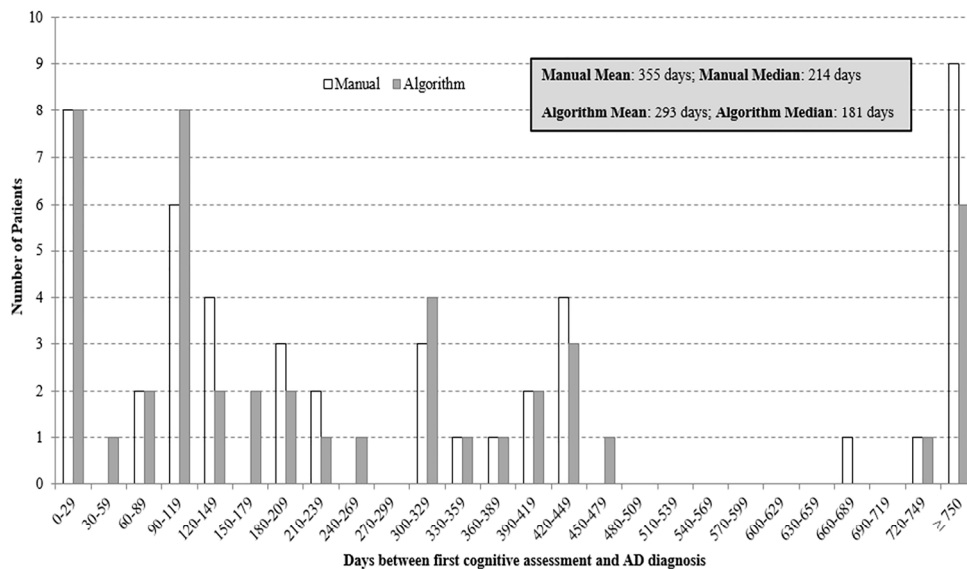

**Abbreviation:** AD = Alzheimer's disease

**Note:**

Manual review included the review of both structured data and text-based data

Figure 2: Distribution of days between first cognitive symptom to cognitive assessment: code-based algorithm vs. comprehensive data review (N=50)

235x171mm (300 x 300 DPI)

1  
2  
3  
4  
5  
6  
7  
8  
9  
10  
11  
12  
13  
14  
15  
16  
17  
18  
19  
20  
21  
22  
23  
24  
25  
26  
27  
28  
29  
30  
31  
32  
33  
34  
35  
36  
37  
38  
39  
40  
41  
42  
43  
44  
45  
46  
47  
48  
49  
50  
51  
52  
53  
54  
55  
56  
57  
58  
59  
60

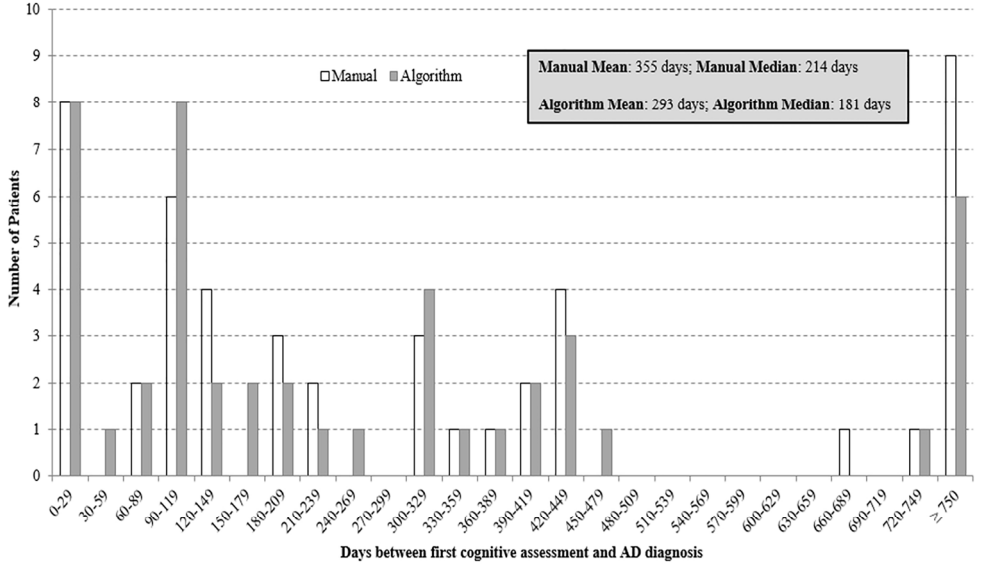

Abbreviation: AD = Alzheimer's disease

Note: Manual review included the review of both structured data and text-based data

Figure 3: Distribution of days between first cognitive assessment to AD diagnosis: code-based algorithm vs. comprehensive data review (N=50)

235x171mm (300 x 300 DPI)

**Appendix Table 1: Read codes and ICD-10 codes used to identify AD and other dementia types**

| <b>Disease</b>            | <b>Code</b>                   | <b>Description</b>                                        |
|---------------------------|-------------------------------|-----------------------------------------------------------|
| <b>Read codes</b>         |                               |                                                           |
| Alzheimer's disease       | Eu00.00                       | [X]Dementia in Alzheimer's                                |
|                           | Eu00000                       | Dementia in Alzheimer's disease with early onset          |
|                           | Eu00011                       | [X]Presenile dement,Alzheimer                             |
|                           | Eu00012                       | Primary degen dementia, Alzheimer's type, presenile onset |
|                           | Eu00013                       | [X]Alzheimer's disease type 2                             |
|                           | Eu00100                       | [X]Late onset Alzheim dementia                            |
|                           | Eu00111                       | [X]Alzheimer's disease type 1                             |
|                           | Eu00112                       | [X]Senile dementia, Alzheimer                             |
|                           | Eu00113                       | Primary degen dementia of Alzheimer's type, senile onset  |
|                           | Eu00200                       | [X]Atypical/mixed Alzheimer's                             |
|                           | Eu00z00                       | [X]Alzheimer's disease unspec                             |
|                           | Eu00z11                       | [X]Alzheimer's dementia unspec                            |
|                           | F110.00                       | Alzheimer's disease                                       |
|                           | F110000                       | Alzheimer dis wth early onset                             |
|                           | F110100                       | Alzheimer's dis wth late onset                            |
|                           | Fyu3000                       | [X]Other Alzheimer's disease                              |
| Vascular dementia         | E004.00                       | Arteriosclerotic dementia                                 |
|                           | E004.11                       | Multi infarct dementia                                    |
|                           | E004000                       | Arterioscl.dementia-uncomplic.                            |
|                           | E004100                       | Arterioscl.dementia+delirium                              |
|                           | E004200                       | Arterioscl.dementia+paranoia                              |
|                           | E004300                       | Arterioscl.dementia+depression                            |
|                           | E004z00                       | Arteriosclerotic dementia NOS                             |
|                           | Eu01.00                       | [X]Vascular dementia                                      |
|                           | Eu01.11                       | [X]Arteriosclerotic dementia                              |
|                           | Eu01000                       | [X]Vascular dementia of acute onset                       |
|                           | Eu01100                       | [X]Multi-infarct dementia                                 |
|                           | Eu01111                       | [X]Predom cortical dementia                               |
|                           | Eu01200                       | [X]Subcortical vascular dement                            |
|                           | Eu01300                       | [X]Mix cort/subcor vasc dement                            |
| Eu01y00                   | [X]Other vascular dementia    |                                                           |
| Eu01z00                   | [X]Vascular dementia unspecif |                                                           |
| Dementia with Lewy bodies | Eu02500                       | [X]Lewy body dementia                                     |
|                           | F116.00                       | Lewy body disease                                         |
| Frontotemporal dementia   | Eu02000                       | [X]Dementia in Pick's disease                             |
|                           | F111.00                       | Pick's disease                                            |
|                           | F118.00                       | Frontotemporal degeneration                               |

| <b>Disease</b>                | <b>Code</b> | <b>Description</b>                                                                                                                         |
|-------------------------------|-------------|--------------------------------------------------------------------------------------------------------------------------------------------|
| Normal-Pressure Hydrocephalus | F113000     | Normal pressure hydrocephalus                                                                                                              |
| Parkinson's dementia          | Eu02300     | [X]Dementia in Parkinson's                                                                                                                 |
|                               | F11x900     | Cerebral degen Parkinson dis                                                                                                               |
| <b>ICD-10 codes</b>           |             |                                                                                                                                            |
| Alzheimer's disease           | G30.x       | Alzheimer disease                                                                                                                          |
|                               | F00.x       | Dementia in Alzheimer disease                                                                                                              |
| Vascular dementia             | F01.x       | Vascular dementia                                                                                                                          |
| Dementia with Lewy bodies     | G31.8       | Other specified degenerative diseases of nervous system (Grey-matter degeneration, Lewy body disease, subacute necrotizing encephalopathy) |
| Frontotemporal dementia       | G31.0       | Circumscribed brain atrophy (frontotemporal dementia, Pick disease, progressive isolated aphasia)                                          |
|                               | F02.0       | Dementia in Pick disease                                                                                                                   |
| Normal-Pressure Hydrocephalus | G91.2       | Normal pressure hydrocephalus                                                                                                              |
| Parkinson's dementia          | F02.3       | Dementia in Parkinson disease                                                                                                              |



**Appendix Table 2: Terms from text-data that are most frequently associated with the earliest dates of cognitive symptoms, cognitive assessment, and AD diagnosis**

| Category   | Key Phrases          |                    |                  |            |
|------------|----------------------|--------------------|------------------|------------|
| Symptom    | memory               | disturbance        | xalzheimers      |            |
|            | dementia             | senile             | decline          |            |
|            | mental               | presenile          | dconfusion       |            |
|            | alzheimers           | dysfunction        | impaired         |            |
|            | 30                   | 27                 | symptoms         |            |
|            | loss                 | neurology          | 29               |            |
|            | symptom              | mmts               | senility         |            |
|            | mmse                 | difficulties       | 24               |            |
|            | cognitive            | deterioration      | confused         |            |
|            | confused             | 22                 | forgetfulness    |            |
|            | poor                 | 26                 | worsening        |            |
|            | problems             | deteriorated       | losing           |            |
|            | forgetful            | difficulty         | 15               |            |
|            | impairment           | disorder           | 20               |            |
|            | xdementia            | deteriorate        | 23               |            |
|            | confusion            | memoy              | 28               |            |
|            | cognition            | problem            | psychoses        |            |
|            | Cognitive assessment | memory             | mmts             | review     |
|            |                      | dementia           | psychiatry       | psychology |
| mental     |                      | examination        | psychogeriatrics |            |
| alzheimers |                      | team               | psych            |            |
| 30         |                      | referral           | exam             |            |
| mmse       |                      | psychiatrist       | psychological    |            |
| cognitive  |                      | psychogeriatrician | test             |            |
| xdementia  |                      | screening          | screen           |            |
| cognition  |                      | assessment         | psychological    |            |
| Diagnosis  | alzheimers           | xalzheimers        |                  |            |

**Appendix Table 3: Final code-based algorithm to identify early indications of cognitive symptoms, cognitive assessment, and AD diagnosis**

| Category             | Diagnosis code | Description                                        |
|----------------------|----------------|----------------------------------------------------|
| <b>Read codes</b>    |                |                                                    |
| Symptom              | 1B1A.12        | memory loss symptom                                |
|                      | F110.00        | alzheimer's disease                                |
|                      | Eu00.00        | [x]dementia in alzheimer's disease                 |
|                      | Eu02z00        | [x] unspecified dementia                           |
|                      | 28G..00        | forgetful                                          |
|                      | Eu00100        | [x]dementia in alzheimer's disease with late onset |
|                      | E2A1000        | mild memory disturbance                            |
|                      | E00z.00        | senile or presenile psychoses nos                  |
|                      | 1B1A.13        | memory disturbance                                 |
|                      | Z7CF800        | poor short-term memory                             |
|                      | Z7C1.00        | impaired cognition                                 |
|                      | R009.00        | [d]confusion                                       |
|                      | Eu00z11        | [x]alzheimer's dementia unspec                     |
|                      | Eu05700        | [X]Mild cognitive disorder                         |
|                      | 2841.00        | Confused                                           |
|                      | 2841.11        | Confusion                                          |
|                      | 1461.00        | H/O: dementia                                      |
|                      | 168..14        | C/O 'Muzzy head'                                   |
|                      | 1JA2.00        | Suspected dementia                                 |
|                      | 28E..00        | Cognitive decline                                  |
|                      | 28H..00        | Mentally vague                                     |
|                      | E00..11        | Senile dementia                                    |
|                      | E00..12        | Senile/presenile dementia                          |
|                      | Eu01y00        | [X]Other vascular dementia                         |
|                      | Eu02500        | [X]Lewy body dementia                              |
|                      | F116.00        | Lewy body disease                                  |
|                      | R00z011        | [D]Memory deficit                                  |
|                      | Z7CEH14        | Memory problem                                     |
| Cognitive assessment | 9N1T.00        | seen in psychiatry clinic                          |
|                      | 388m.00        | mini-mental state examination                      |
|                      | 388V.00        | mini mental state score                            |
|                      | 6AB..00        | dementia annual review                             |
|                      | 9N1M.00        | seen in psychology clinic                          |
|                      | ZL9D.00        | seen by psychiatrist                               |
|                      | 9Nk1.00        | seen in memory clinic                              |
|                      | 3AD3.00        | six item cognitive impairment test                 |

| Category          | Diagnosis code | Description                                          |
|-------------------|----------------|------------------------------------------------------|
|                   | 9Nk6.00        | seen in mental health clinic                         |
|                   | 6A6..00        | mental health review                                 |
|                   | 388m.11        | mmse score                                           |
|                   | 9N1R.00        | seen in neurology clinic                             |
|                   | ZRaA.00        | mini-mental state examination                        |
|                   | 9N2a.11        | Seen by CPN                                          |
|                   | ZL9D412        | Seen by old age psychiatrist                         |
|                   | ZQ3E.00        | Mental health assessment                             |
|                   | 3A...11        | Memory assessment                                    |
|                   | 8CM2.00        | Psychiatry care plan                                 |
|                   | ZL9D400        | Seen by psychogeriatrician                           |
|                   | 38C1000        | Assessment for dementia                              |
|                   | 38Dv.00        | GPCOG - general practitioner assessment of cognition |
|                   | 3A...12        | Dementia assessment                                  |
|                   | 3AF..00        | Addenbrooke's cognitive examination revised          |
|                   | 66h..00        | Dementia monitoring                                  |
|                   | 8A2..00        | Psychiatric monitoring                               |
|                   | 8CMZ.00        | Dementia care plan                                   |
|                   | 8HLC.00        | Psychogeriatric D.V. done                            |
|                   | 9N1yA00        | Seen in psychogeriatric clinic                       |
|                   | 9NN7.00        | Under care of mental health team                     |
|                   | ZLA2E00        | Seen by psychiatric nurse                            |
|                   | ZLA3111        | Seen by CPN                                          |
|                   | ZLB5.00        | Seen by mental health counsellor                     |
| Relevant referral | 8H4D.00        | Referral to psychogeriatrician                       |
|                   | 8H47.00        | Geriatric referral                                   |
|                   | 8HKC.00        | Psychogeriatrics D.V. requestd                       |
|                   | 8HTY.00        | Referral to memory clinic                            |
|                   | 8Hc..00        | Referral to mental health team                       |
|                   | 8H49.00        | Psychiatric referral                                 |
|                   | 8HHo.00        | Referral to older age community mental health team   |
|                   | ZL5B.00        | Referral to psychiatrist                             |
| Encounter         | 9N1C.11        | Home visit                                           |
|                   | 9N33.11        | Letter encounter                                     |
|                   | 9N33.00        | Letter encounter from patient                        |
|                   | 9N35.00        | Letter encounter to patient                          |
|                   | 9N36.11        | Letter from consultant                               |
|                   | 9N36.00        | Letter from specialist                               |
|                   | 8H87.00        | Follow-up 1 month                                    |
|                   | 9NV..00        | Follow-up encounter                                  |

| Category       | Diagnosis code | Description                           |
|----------------|----------------|---------------------------------------|
|                | 9N32.00        | Third party encounter                 |
|                | 6A...00        | Patient reviewed                      |
|                | 9N3D.00        | Letter received                       |
|                | 2....11        | Examination of patient                |
|                | 9H...00        | Mental health administration          |
|                | ZL9AL00        | Seen by care of the elderly physician |
|                | 68Q..00        | Geriatric screening                   |
|                | 69D1.00        | Geriatric health exam.                |
|                | 9N1U.00        | Seen in elderly assessment clinic     |
|                | 9Nk5.00        | Seen in elderly care clinic           |
|                | 3876.00        | Multidisciplinary assessment          |
|                | 3891.00        | Initial patient assessment            |
|                | 3Z...00        | Diagnostic procedure NOS              |
|                | 67...11        | Counselling                           |
|                | 671C.00        | Discussed with doctor                 |
|                | 68P..00        | Adult screening                       |
|                | 68Q3.00        | Geriatric 75 year screen              |
|                | 9N02.00        | Seen in geriatric clinic              |
|                | 9N0c.00        | Seen in private clinic                |
|                | 9N11.00        | Seen in GP's surgery                  |
|                | 9N1C.00        | Seen in own home                      |
|                | 9N22.00        | Seen by practice nurse                |
|                | 9N2G.00        | Seen by consultant                    |
|                | 9N2N.00        | Seen by Rota Doctor                   |
|                | 9N2R.00        | Seen by co-operative doctor           |
|                | 9N2o.00        | Seen by health support worker         |
|                | 9N7..11        | Follow-up consultation                |
|                | 9NFA.00        | District nurse visit                  |
|                | 9NY..00        | Appointment                           |
|                | 9Na..00        | Consultation                          |
|                | ZL23300        | Under care of district nurse          |
|                | ZV67.00        | [V]Follow-up examination              |
| Other referral | 8HR1.00        | Refer for ECG recording               |
|                | 8H7Y.00        | Refer to acupuncture                  |
|                | 8H77.00        | Refer to physiotherapist              |
|                | 8H...00        | Referral for further care             |
|                | 8H68.00        | Referral to haematologist             |
|                | 8HTb.00        | Referral to male urology clinic       |
|                | 8H7..12        | Referral to nurse                     |
|                | 8H4J.00        | Referred to anaesthetist              |
|                | 8H4K.00        | Referred to endocrinologist           |

| Category            | Diagnosis code | Description                                                                          |
|---------------------|----------------|--------------------------------------------------------------------------------------|
|                     | 8H52.00        | Ophthalmological referral                                                            |
|                     | 8H53.00        | ENT referral                                                                         |
|                     | 8H54.00        | Orthopaedic referral                                                                 |
|                     | 8H43.00        | Dermatological referral                                                              |
|                     | 8H7R.00        | Refer to chiropodist                                                                 |
|                     | 8H48.00        | Gastroenterological referral                                                         |
|                     | 8H4L.00        | Referred to nephrologist                                                             |
|                     | 8H58.00        | Gynaecological referral                                                              |
|                     | 8H59.00        | Referred to plastic surgeon                                                          |
|                     | 8H5B.00        | Referred to urologist                                                                |
|                     | 8H5D.00        | Referred to vascular surgeon                                                         |
|                     | 8H5J.00        | Referral to colorectal surgeon                                                       |
|                     | 8H72.00        | Refer to district nurse                                                              |
|                     | 8H7G.00        | Refer to speech therapist                                                            |
|                     | 8H7Q.00        | Refer to surgical fitter                                                             |
|                     | 8H7V.00        | Refer to audiologist                                                                 |
|                     | 8H7X.00        | Refer to podiatry                                                                    |
|                     | 8HBJ.00        | Stroke / transient ischaemic attack referral                                         |
|                     | 8HD..00        | Refer to hospital OPD                                                                |
|                     | 8HH5.00        | Refer to domiciliary physiotherapy                                                   |
|                     | 8HHk.00        | Referral to hospital phlebotomist                                                    |
|                     | 8HHl.00        | Referral to practice phlebotomist                                                    |
|                     | 8HQ..00        | Refer for imaging                                                                    |
|                     | 8HQ2.00        | Refer for ultrasound investign                                                       |
|                     | 8HQ8.00        | Referral for dual energy X-ray photon absorptiometry scan                            |
|                     | 8HR8.00        | Referral for 24 hour blood pressure recording                                        |
|                     | 8HTX.00        | Referral to incontinence clinic                                                      |
|                     | 8HVQ.00        | Private referral to rheumatologist                                                   |
|                     | 8He..00        | Referral to intermediate care                                                        |
|                     | 8He0.00        | Referral to intermediate care - hospital at home                                     |
|                     | 8Hj0.00        | Referral to diabetes structured education programme                                  |
|                     | ZL85111        | Referral to community physiotherapist                                                |
| Diagnosis           | F110.00        | alzheimer's disease                                                                  |
|                     | Eu00.00        | [x]dementia in alzheimer's disease                                                   |
|                     | Eu00100        | [x]dementia in alzheimer's disease with late onset                                   |
|                     | Eu00z11        | [x]alzheimer's dementia unspec                                                       |
| <b>ICD-10 codes</b> |                |                                                                                      |
| Symptom             | F03            | unspecified dementia                                                                 |
|                     | R418           | other and unspecified symptoms and signs involving cognitive functions and awareness |
|                     | R54            | senility                                                                             |
|                     | G309           | Alzheimer's disease, unspecified                                                     |

| <b>Category</b>                  | <b>Diagnosis code</b> | <b>Description</b>                                        |
|----------------------------------|-----------------------|-----------------------------------------------------------|
|                                  | G309D                 | Alzheimer's disease, unspecified                          |
|                                  | R410                  | Disorientation, unspecified                               |
|                                  | F051                  | Delirium superimposed on dementia                         |
|                                  | F028                  | Dementia in other specified diseases classified elsewhere |
|                                  | F067                  | Mild cognitive disorder                                   |
|                                  | F99                   | Mental disorder, not otherwise specified                  |
| Cognitive assessment - Encounter | Z139                  | Special screening examination, unspecified                |
| Diagnosis                        | G309                  | Alzheimer's disease, unspecified                          |
|                                  | G309D                 | Alzheimer's disease, unspecified                          |

For peer review only

## Appendix Figure 1: Study Schematic

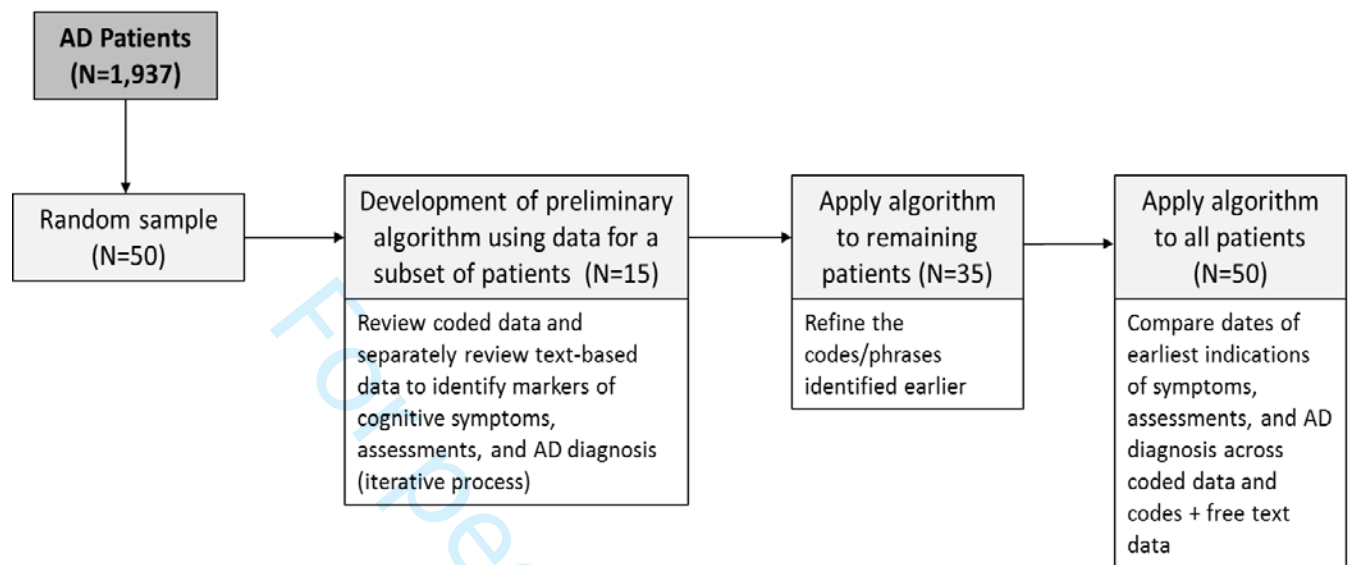

**Abbreviation:** AD = Alzheimer's disease

## Appendix Figure 2: Cognitive impairment and cognitive assessment relative to AD diagnosis

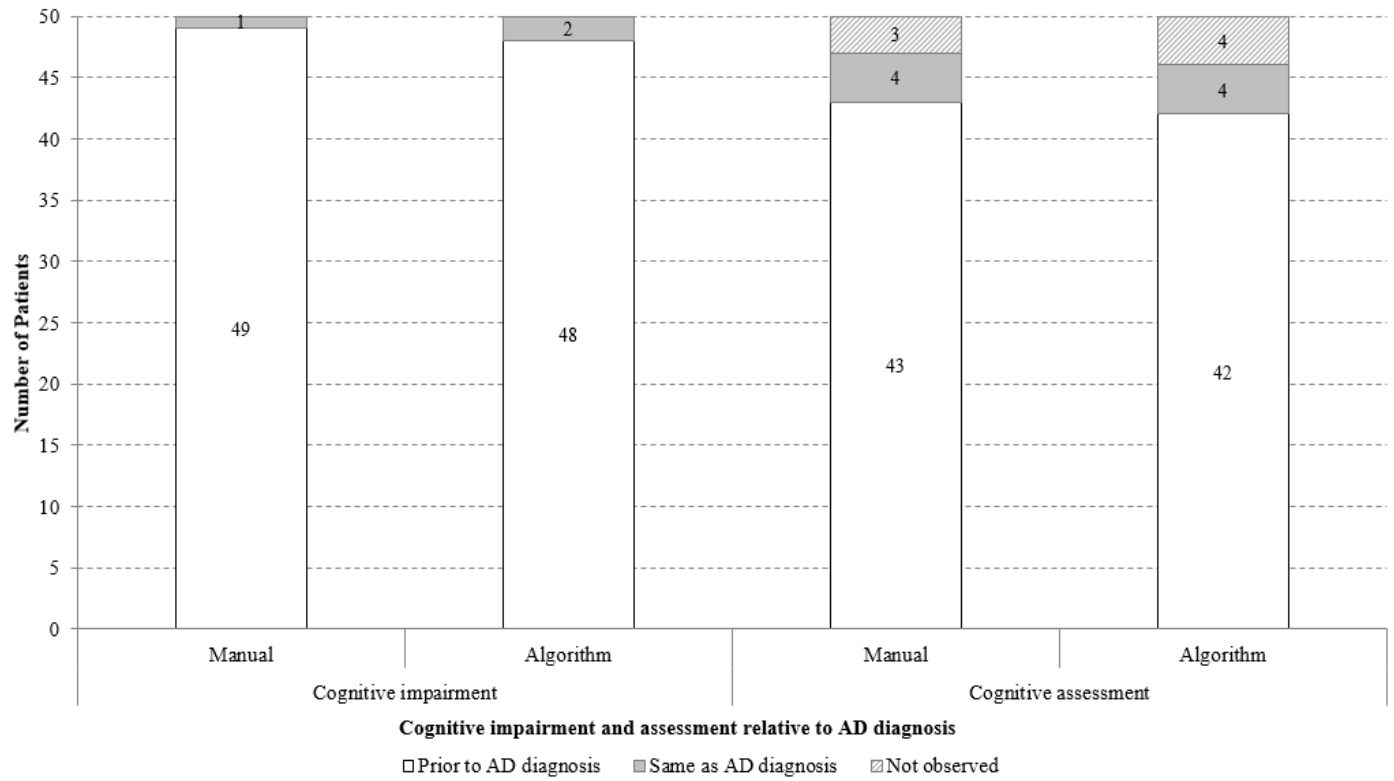

**Abbreviation:** AD = Alzheimer's disease

**Note:**

Manual review included the review of both structured data and text-based data



STROBE Statement—Checklist of items that should be included in reports of *cohort studies*

|                              | Item No | Recommendation                                                                                                                                                                                    | Page no.        |
|------------------------------|---------|---------------------------------------------------------------------------------------------------------------------------------------------------------------------------------------------------|-----------------|
| <b>Title and abstract</b>    | 1       | (a) Indicate the study's design with a commonly used term in the title or the abstract                                                                                                            | p.1             |
|                              |         | (b) Provide in the abstract an informative and balanced summary of what was done and what was found                                                                                               | pp.2-3          |
| <b>Introduction</b>          |         |                                                                                                                                                                                                   |                 |
| Background/rationale         | 2       | Explain the scientific background and rationale for the investigation being reported                                                                                                              | pp. 5-6         |
| Objectives                   | 3       | State specific objectives, including any prespecified hypotheses                                                                                                                                  | p.6             |
| <b>Methods</b>               |         |                                                                                                                                                                                                   |                 |
| Study design                 | 4       | Present key elements of study design early in the paper                                                                                                                                           | p. 1;<br>pp.6-7 |
| Setting                      | 5       | Describe the setting, locations, and relevant dates, including periods of recruitment, exposure, follow-up, and data collection                                                                   | pp.6-7          |
| Participants                 | 6       | (a) Give the eligibility criteria, and the sources and methods of selection of participants. Describe methods of follow-up                                                                        | pp.7-8          |
|                              |         | (b) For matched studies, give matching criteria and number of exposed and unexposed                                                                                                               | N/A             |
| Variables                    | 7       | Clearly define all outcomes, exposures, predictors, potential confounders, and effect modifiers. Give diagnostic criteria, if applicable                                                          | pp.8-10         |
| Data sources/<br>measurement | 8*      | For each variable of interest, give sources of data and details of methods of assessment (measurement). Describe comparability of assessment methods if there is more than one group              | pp. 6-10        |
| Bias                         | 9       | Describe any efforts to address potential sources of bias                                                                                                                                         | N/A             |
| Study size                   | 10      | Explain how the study size was arrived at                                                                                                                                                         | pp.7-8          |
| Quantitative variables       | 11      | Explain how quantitative variables were handled in the analyses. If applicable, describe which groupings were chosen and why                                                                      | N/A             |
| Statistical methods          | 12      | (a) Describe all statistical methods, including those used to control for confounding                                                                                                             | pp.8-10         |
|                              |         | (b) Describe any methods used to examine subgroups and interactions                                                                                                                               | N/A             |
|                              |         | (c) Explain how missing data were addressed                                                                                                                                                       | N/A             |
|                              |         | (d) If applicable, explain how loss to follow-up was addressed                                                                                                                                    | N/A             |
|                              |         | (e) Describe any sensitivity analyses                                                                                                                                                             | N/A             |
| <b>Results</b>               |         |                                                                                                                                                                                                   |                 |
| Participants                 | 13*     | (a) Report numbers of individuals at each stage of study—eg numbers potentially eligible, examined for eligibility, confirmed eligible, included in the study, completing follow-up, and analysed | pp. 10-11       |
|                              |         | (b) Give reasons for non-participation at each stage                                                                                                                                              | Figure 1        |
|                              |         | (c) Consider use of a flow diagram                                                                                                                                                                | Figure 1        |
| Descriptive data             | 14*     | (a) Give characteristics of study participants (eg demographic, clinical, social) and information on exposures and potential confounders                                                          | pp. 10-11       |
|                              |         | (b) Indicate number of participants with missing data for each variable of interest                                                                                                               | N/A             |
|                              |         | (c) Summarise follow-up time (eg, average and total amount)                                                                                                                                       | N/A             |

|    |                          |     |                                                                                |          |
|----|--------------------------|-----|--------------------------------------------------------------------------------|----------|
| 1  | Outcome data             | 15* | Report numbers of outcome events or summary measures over time                 | N/A      |
| 2  | Main results             | 16  | (a) Give unadjusted estimates and, if applicable, confounder-adjusted          | pp.11-14 |
| 3  |                          |     | estimates and their precision (eg, 95% confidence interval). Make clear        |          |
| 4  |                          |     | which confounders were adjusted for and why they were included                 |          |
| 5  |                          |     | (b) Report category boundaries when continuous variables were                  | N/A      |
| 6  |                          |     | categorized                                                                    |          |
| 7  |                          |     | (c) If relevant, consider translating estimates of relative risk into absolute | N/A      |
| 8  |                          |     | risk for a meaningful time period                                              |          |
| 9  |                          |     |                                                                                |          |
| 10 | Other analyses           | 17  | Report other analyses done—eg analyses of subgroups and interactions,          | N/A      |
| 11 |                          |     | and sensitivity analyses                                                       |          |
| 12 |                          |     |                                                                                |          |
| 13 | <b>Discussion</b>        |     |                                                                                |          |
| 14 | Key results              | 18  | Summarise key results with reference to study objectives                       | pp.14-15 |
| 15 |                          |     |                                                                                |          |
| 16 | Limitations              | 19  | Discuss limitations of the study, taking into account sources of potential     | pp.16-17 |
| 17 |                          |     | bias or imprecision. Discuss both direction and magnitude of any potential     |          |
| 18 |                          |     | bias                                                                           |          |
| 19 |                          |     |                                                                                |          |
| 20 | Interpretation           | 20  | Give a cautious overall interpretation of results considering objectives,      | p.17     |
| 21 |                          |     | limitations, multiplicity of analyses, results from similar studies, and other |          |
| 22 |                          |     | relevant evidence                                                              |          |
| 23 |                          |     |                                                                                |          |
| 24 | Generalisability         | 21  | Discuss the generalisability (external validity) of the study results          | pp.16-17 |
| 25 |                          |     |                                                                                |          |
| 26 |                          |     |                                                                                |          |
| 27 | <b>Other information</b> |     |                                                                                |          |
| 28 | Funding                  | 22  | Give the source of funding and the role of the funders for the present study   | p. 18    |
| 29 |                          |     | and, if applicable, for the original study on which the present article is     |          |
| 30 |                          |     | based                                                                          |          |
| 31 |                          |     |                                                                                |          |

\*Give information separately for exposed and unexposed groups.

**Note:** An Explanation and Elaboration article discusses each checklist item and gives methodological background and published examples of transparent reporting. The STROBE checklist is best used in conjunction with this article (freely available on the Web sites of PLoS Medicine at <http://www.plosmedicine.org/>, Annals of Internal Medicine at <http://www.annals.org/>, and Epidemiology at <http://www.epidem.com/>). Information on the STROBE Initiative is available at <http://www.strobe-statement.org>.
