# Supplementary material for: Reliability of coded data to identify earliest indications of cognitive decline, cognitive evaluation and Alzheimer’s disease diagnosis: a pilot study in England
Source: PubMed Central journal article supplement — BMJ Open. 2018 Mar 22;8(3):e019684. doi: 10.1136/bmjopen-2017-019684 (PMC5875601; doi:10.1136/bmjopen-2017-019684), 2018-03-22
Supplement: bmjopen-2017-019684supp001.pdf [file bmjopen-2017-019684supp001.pdf]

**Appendix Table 1: Read codes and ICD-10 codes used to identify AD and other dementia types**

| <b>Disease</b>            | <b>Code</b> | <b>Description</b>                                        |
|---------------------------|-------------|-----------------------------------------------------------|
| <b>Read codes</b>         |             |                                                           |
| Alzheimer's disease       | Eu00.00     | [X]Dementia in Alzheimer's                                |
|                           | Eu00000     | Dementia in Alzheimer's disease with early onset          |
|                           | Eu00011     | [X]Presenile dement,Alzheimer                             |
|                           | Eu00012     | Primary degen dementia, Alzheimer's type, presenile onset |
|                           | Eu00013     | [X]Alzheimer's disease type 2                             |
|                           | Eu00100     | [X]Late onset Alzheim dementia                            |
|                           | Eu00111     | [X]Alzheimer's disease type 1                             |
|                           | Eu00112     | [X]Senile dementia, Alzheimer                             |
|                           | Eu00113     | Primary degen dementia of Alzheimer's type, senile onset  |
|                           | Eu00200     | [X]Atypical/mixed Alzheimer's                             |
|                           | Eu00z00     | [X]Alzheimer's disease unspec                             |
|                           | Eu00z11     | [X]Alzheimer's dementia unspec                            |
|                           | F110.00     | Alzheimer's disease                                       |
|                           | F110000     | Alzheimer dis wth early onset                             |
|                           | F110100     | Alzheimer's dis wth late onset                            |
|                           | Fyu3000     | [X]Other Alzheimer's disease                              |
| Vascular dementia         | E004.00     | Arteriosclerotic dementia                                 |
|                           | E004.11     | Multi infarct dementia                                    |
|                           | E004000     | Arterioscl.dementia-uncomplic.                            |
|                           | E004100     | Arterioscl.dementia+delirium                              |
|                           | E004200     | Arterioscl.dementia+paranoia                              |
|                           | E004300     | Arterioscl.dementia+depression                            |
|                           | E004z00     | Arteriosclerotic dementia NOS                             |
|                           | Eu01.00     | [X]Vascular dementia                                      |
|                           | Eu01.11     | [X]Arteriosclerotic dementia                              |
|                           | Eu01000     | [X]Vascular dementia of acute onset                       |
|                           | Eu01100     | [X]Multi-infarct dementia                                 |
|                           | Eu01111     | [X]Predom cortical dementia                               |
|                           | Eu01200     | [X]Subcortical vascular dement                            |
|                           | Eu01300     | [X]Mix cort/subcor vasc dement                            |
|                           | Eu01y00     | [X]Other vascular dementia                                |
|                           | Eu01z00     | [X]Vascular dementia unspecif                             |
| Dementia with Lewy bodies | Eu02500     | [X]Lewy body dementia                                     |
|                           | F116.00     | Lewy body disease                                         |
| Frontotemporal dementia   | Eu02000     | [X]Dementia in Pick's disease                             |
|                           | F111.00     | Pick's disease                                            |
|                           | F118.00     | Frontotemporal degeneration                               |

| <b>Disease</b>                | <b>Code</b> | <b>Description</b>                                                                                                                         |
|-------------------------------|-------------|--------------------------------------------------------------------------------------------------------------------------------------------|
| Normal-Pressure Hydrocephalus | F113000     | Normal pressure hydrocephalus                                                                                                              |
| Parkinson's dementia          | Eu02300     | [X]Dementia in Parkinson's                                                                                                                 |
|                               | F11x900     | Cerebral degen Parkinson dis                                                                                                               |
| <b>ICD-10 codes</b>           |             |                                                                                                                                            |
| Alzheimer's disease           | G30.x       | Alzheimer disease                                                                                                                          |
|                               | F00.x       | Dementia in Alzheimer disease                                                                                                              |
| Vascular dementia             | F01.x       | Vascular dementia                                                                                                                          |
| Dementia with Lewy bodies     | G31.8       | Other specified degenerative diseases of nervous system (Grey-matter degeneration, Lewy body disease, subacute necrotizing encephalopathy) |
| Frontotemporal dementia       | G31.0       | Circumscribed brain atrophy (frontotemporal dementia, Pick disease, progressive isolated aphasia)                                          |
|                               | F02.0       | Dementia in Pick disease                                                                                                                   |
| Normal-Pressure Hydrocephalus | G91.2       | Normal pressure hydrocephalus                                                                                                              |
| Parkinson's dementia          | F02.3       | Dementia in Parkinson disease                                                                                                              |

**Appendix Table 2: Terms from text-data that are most frequently associated with the earliest dates of cognitive symptoms, cognitive assessment, and AD diagnosis**

| Category             | Key Phrases |                    |                  |
|----------------------|-------------|--------------------|------------------|
| Symptom              | memory      | disturbance        | xalzheimers      |
|                      | dementia    | senile             | decline          |
|                      | mental      | presenile          | dconfusion       |
|                      | alzheimers  | dysfunction        | impaired         |
|                      | 30          | 27                 | symptoms         |
|                      | loss        | neurology          | 29               |
|                      | symptom     | mmts               | senility         |
|                      | mmse        | difficulties       | 24               |
|                      | cognitive   | deterioration      | confused         |
|                      | confused    | 22                 | forgetfulness    |
|                      | poor        | 26                 | worsening        |
|                      | problems    | deteriorated       | losing           |
|                      | forgetful   | difficulty         | 15               |
|                      | impairment  | disorder           | 20               |
|                      | xdementia   | deteriorate        | 23               |
|                      | confusion   | memoy              | 28               |
| cognition            | problem     | psychoses          |                  |
| Cognitive assessment | memory      | mmts               | review           |
|                      | dementia    | psychiatry         | psychology       |
|                      | mental      | examination        | psychogeriatrics |
|                      | alzheimers  | team               | psych            |
|                      | 30          | referral           | exam             |
|                      | mmse        | psychiatrist       | psychological    |
|                      | cognitive   | psychogeriatrician | test             |
|                      | xdementia   | screening          | screen           |
|                      | cognition   | assessment         | psychological    |
| neurology            |             |                    |                  |
| Diagnosis            | alzheimers  | xalzheimers        |                  |

**Appendix Table 3: Final code-based algorithm to identify early indications of cognitive symptoms, cognitive assessment, and AD diagnosis**

| <b>Category</b>              | <b>Diagnosis code</b> | <b>Description</b>                                 |                               |
|------------------------------|-----------------------|----------------------------------------------------|-------------------------------|
| <b>Read codes</b><br>Symptom | 1B1A.12               | memory loss symptom                                |                               |
|                              | F110.00               | alzheimer's disease                                |                               |
|                              | Eu00.00               | [x]dementia in alzheimer's disease                 |                               |
|                              | Eu02z00               | [x] unspecified dementia                           |                               |
|                              | 28G..00               | forgetful                                          |                               |
|                              | Eu00100               | [x]dementia in alzheimer's disease with late onset |                               |
|                              | E2A1000               | mild memory disturbance                            |                               |
|                              | E00z.00               | senile or presenile psychoses nos                  |                               |
|                              | 1B1A.13               | memory disturbance                                 |                               |
|                              | Z7CF800               | poor short-term memory                             |                               |
|                              | Z7C1.00               | impaired cognition                                 |                               |
|                              | R009.00               | [d]confusion                                       |                               |
|                              | Eu00z11               | [x]alzheimer's dementia unspec                     |                               |
|                              | Eu05700               | [X]Mild cognitive disorder                         |                               |
|                              | 2841.00               | Confused                                           |                               |
|                              | 2841.11               | Confusion                                          |                               |
|                              | 1461.00               | H/O: dementia                                      |                               |
|                              | 168..14               | C/O 'Muzzy head'                                   |                               |
|                              | 1JA2.00               | Suspected dementia                                 |                               |
|                              | 28E..00               | Cognitive decline                                  |                               |
|                              | 28H..00               | Mentally vague                                     |                               |
|                              | E00..11               | Senile dementia                                    |                               |
|                              | E00..12               | Senile/presenile dementia                          |                               |
|                              | Eu01y00               | [X]Other vascular dementia                         |                               |
|                              | Eu02500               | [X]Lewy body dementia                              |                               |
|                              | F116.00               | Lewy body disease                                  |                               |
|                              | R00z011               | [D]Memory deficit                                  |                               |
|                              | Z7CEH14               | Memory problem                                     |                               |
|                              | Cognitive assessment  | 9N1T.00                                            | seen in psychiatry clinic     |
|                              |                       | 388m.00                                            | mini-mental state examination |
|                              |                       | 388V.00                                            | mini mental state score       |
|                              |                       | 6AB..00                                            | dementia annual review        |
| 9N1M.00                      |                       | seen in psychology clinic                          |                               |
| ZL9D.00                      |                       | seen by psychiatrist                               |                               |
| 9Nk1.00                      |                       | seen in memory clinic                              |                               |
| 3AD3.00                      |                       | six item cognitive impairment test                 |                               |

| <b>Category</b>   | <b>Diagnosis code</b> | <b>Description</b>                                   |
|-------------------|-----------------------|------------------------------------------------------|
|                   | 9Nk6.00               | seen in mental health clinic                         |
|                   | 6A6..00               | mental health review                                 |
|                   | 388m.11               | mmse score                                           |
|                   | 9N1R.00               | seen in neurology clinic                             |
|                   | ZRaA.00               | mini-mental state examination                        |
|                   | 9N2a.11               | Seen by CPN                                          |
|                   | ZL9D412               | Seen by old age psychiatrist                         |
|                   | ZQ3E.00               | Mental health assessment                             |
|                   | 3A...11               | Memory assessment                                    |
|                   | 8CM2.00               | Psychiatry care plan                                 |
|                   | ZL9D400               | Seen by psychogeriatrician                           |
|                   | 38C1000               | Assessment for dementia                              |
|                   | 38Dv.00               | GPCOG - general practitioner assessment of cognition |
|                   | 3A...12               | Dementia assessment                                  |
|                   | 3AF..00               | Addenbrooke's cognitive examination revised          |
|                   | 66h..00               | Dementia monitoring                                  |
|                   | 8A2..00               | Psychiatric monitoring                               |
|                   | 8CMZ.00               | Dementia care plan                                   |
|                   | 8HLC.00               | Psychogeriatric D.V. done                            |
|                   | 9N1yA00               | Seen in psychogeriatric clinic                       |
|                   | 9NN7.00               | Under care of mental health team                     |
|                   | ZLA2E00               | Seen by psychiatric nurse                            |
|                   | ZLA3111               | Seen by CPN                                          |
|                   | ZLB5.00               | Seen by mental health counsellor                     |
| Relevant referral | 8H4D.00               | Referral to psychogeriatrician                       |
|                   | 8H47.00               | Geriatric referral                                   |
|                   | 8HKC.00               | Psychogeriatrics D.V. requestd                       |
|                   | 8HTY.00               | Referral to memory clinic                            |
|                   | 8Hc..00               | Referral to mental health team                       |
|                   | 8H49.00               | Psychiatric referral                                 |
|                   | 8HHo.00               | Referral to older age community mental health team   |
|                   | ZL5B.00               | Referral to psychiatrist                             |
| Encounter         | 9N1C.11               | Home visit                                           |
|                   | 9N33.11               | Letter encounter                                     |
|                   | 9N33.00               | Letter encounter from patient                        |
|                   | 9N35.00               | Letter encounter to patient                          |
|                   | 9N36.11               | Letter from consultant                               |
|                   | 9N36.00               | Letter from specialist                               |
|                   | 8H87.00               | Follow-up 1 month                                    |
|                   | 9NV..00               | Follow-up encounter                                  |

| <b>Category</b> | <b>Diagnosis code</b> | <b>Description</b>                    |
|-----------------|-----------------------|---------------------------------------|
|                 | 9N32.00               | Third party encounter                 |
|                 | 6A...00               | Patient reviewed                      |
|                 | 9N3D.00               | Letter received                       |
|                 | 2....11               | Examination of patient                |
|                 | 9H...00               | Mental health administration          |
|                 | ZL9AL00               | Seen by care of the elderly physician |
|                 | 68Q..00               | Geriatric screening                   |
|                 | 69D1.00               | Geriatric health exam.                |
|                 | 9N1U.00               | Seen in elderly assessment clinic     |
|                 | 9Nk5.00               | Seen in elderly care clinic           |
|                 | 3876.00               | Multidisciplinary assessment          |
|                 | 3891.00               | Initial patient assessment            |
|                 | 3Z...00               | Diagnostic procedure NOS              |
|                 | 67...11               | Counselling                           |
|                 | 671C.00               | Discussed with doctor                 |
|                 | 68P..00               | Adult screening                       |
|                 | 68Q3.00               | Geriatric 75 year screen              |
|                 | 9N02.00               | Seen in geriatric clinic              |
|                 | 9N0c.00               | Seen in private clinic                |
|                 | 9N11.00               | Seen in GP's surgery                  |
|                 | 9N1C.00               | Seen in own home                      |
|                 | 9N22.00               | Seen by practice nurse                |
|                 | 9N2G.00               | Seen by consultant                    |
|                 | 9N2N.00               | Seen by Rota Doctor                   |
|                 | 9N2R.00               | Seen by co-operative doctor           |
|                 | 9N2o.00               | Seen by health support worker         |
|                 | 9N7..11               | Follow-up consultation                |
|                 | 9NFA.00               | District nurse visit                  |
|                 | 9NY..00               | Appointment                           |
|                 | 9Na..00               | Consultation                          |
|                 | ZL23300               | Under care of district nurse          |
|                 | ZV67.00               | [V]Follow-up examination              |
| Other referral  | 8HR1.00               | Refer for ECG recording               |
|                 | 8H7Y.00               | Refer to acupuncture                  |
|                 | 8H77.00               | Refer to physiotherapist              |
|                 | 8H...00               | Referral for further care             |
|                 | 8H68.00               | Referral to haematologist             |
|                 | 8HTb.00               | Referral to male urology clinic       |
|                 | 8H7..12               | Referral to nurse                     |
|                 | 8H4J.00               | Referred to anaesthetist              |
|                 | 8H4K.00               | Referred to endocrinologist           |

| <b>Category</b>     | <b>Diagnosis code</b> | <b>Description</b>                                                                   |
|---------------------|-----------------------|--------------------------------------------------------------------------------------|
|                     | 8H52.00               | Ophthalmological referral                                                            |
|                     | 8H53.00               | ENT referral                                                                         |
|                     | 8H54.00               | Orthopaedic referral                                                                 |
|                     | 8H43.00               | Dermatological referral                                                              |
|                     | 8H7R.00               | Refer to chiropodist                                                                 |
|                     | 8H48.00               | Gastroenterological referral                                                         |
|                     | 8H4L.00               | Referred to nephrologist                                                             |
|                     | 8H58.00               | Gynaecological referral                                                              |
|                     | 8H59.00               | Referred to plastic surgeon                                                          |
|                     | 8H5B.00               | Referred to urologist                                                                |
|                     | 8H5D.00               | Referred to vascular surgeon                                                         |
|                     | 8H5J.00               | Referral to colorectal surgeon                                                       |
|                     | 8H72.00               | Refer to district nurse                                                              |
|                     | 8H7G.00               | Refer to speech therapist                                                            |
|                     | 8H7Q.00               | Refer to surgical fitter                                                             |
|                     | 8H7V.00               | Refer to audiologist                                                                 |
|                     | 8H7X.00               | Refer to podiatry                                                                    |
|                     | 8HBJ.00               | Stroke / transient ischaemic attack referral                                         |
|                     | 8HD..00               | Refer to hospital OPD                                                                |
|                     | 8HH5.00               | Refer to domiciliary physiotherapy                                                   |
|                     | 8HHk.00               | Referral to hospital phlebotomist                                                    |
|                     | 8HHl.00               | Referral to practice phlebotomist                                                    |
|                     | 8HQ..00               | Refer for imaging                                                                    |
|                     | 8HQ2.00               | Refer for ultrasound investign                                                       |
|                     | 8HQ8.00               | Referral for dual energy X-ray photon absorptiometry scan                            |
|                     | 8HR8.00               | Referral for 24 hour blood pressure recording                                        |
|                     | 8HTX.00               | Referral to incontinence clinic                                                      |
|                     | 8HVQ.00               | Private referral to rheumatologist                                                   |
|                     | 8He..00               | Referral to intermediate care                                                        |
|                     | 8He0.00               | Referral to intermediate care - hospital at home                                     |
|                     | 8Hj0.00               | Referral to diabetes structured education programme                                  |
|                     | ZL85111               | Referral to community physiotherapist                                                |
| Diagnosis           | F110.00               | alzheimer's disease                                                                  |
|                     | Eu00.00               | [x]dementia in alzheimer's disease                                                   |
|                     | Eu00100               | [x]dementia in alzheimer's disease with late onset                                   |
|                     | Eu00z11               | [x]alzheimer's dementia unspec                                                       |
| <b>ICD-10 codes</b> |                       |                                                                                      |
| Symptom             | F03                   | unspecified dementia                                                                 |
|                     | R418                  | other and unspecified symptoms and signs involving cognitive functions and awareness |
|                     | R54                   | senility                                                                             |
|                     | G309                  | Alzheimer's disease, unspecified                                                     |

| <b>Category</b>                  | <b>Diagnosis code</b> | <b>Description</b>                                        |
|----------------------------------|-----------------------|-----------------------------------------------------------|
|                                  | G309D                 | Alzheimer's disease, unspecified                          |
|                                  | R410                  | Disorientation, unspecified                               |
|                                  | F051                  | Delirium superimposed on dementia                         |
|                                  | F028                  | Dementia in other specified diseases classified elsewhere |
|                                  | F067                  | Mild cognitive disorder                                   |
|                                  | F99                   | Mental disorder, not otherwise specified                  |
| Cognitive assessment - Encounter | Z139                  | Special screening examination, unspecified                |
| Diagnosis                        | G309                  | Alzheimer's disease, unspecified                          |
|                                  | G309D                 | Alzheimer's disease, unspecified                          |



## Appendix Figure 1: Study Schematic

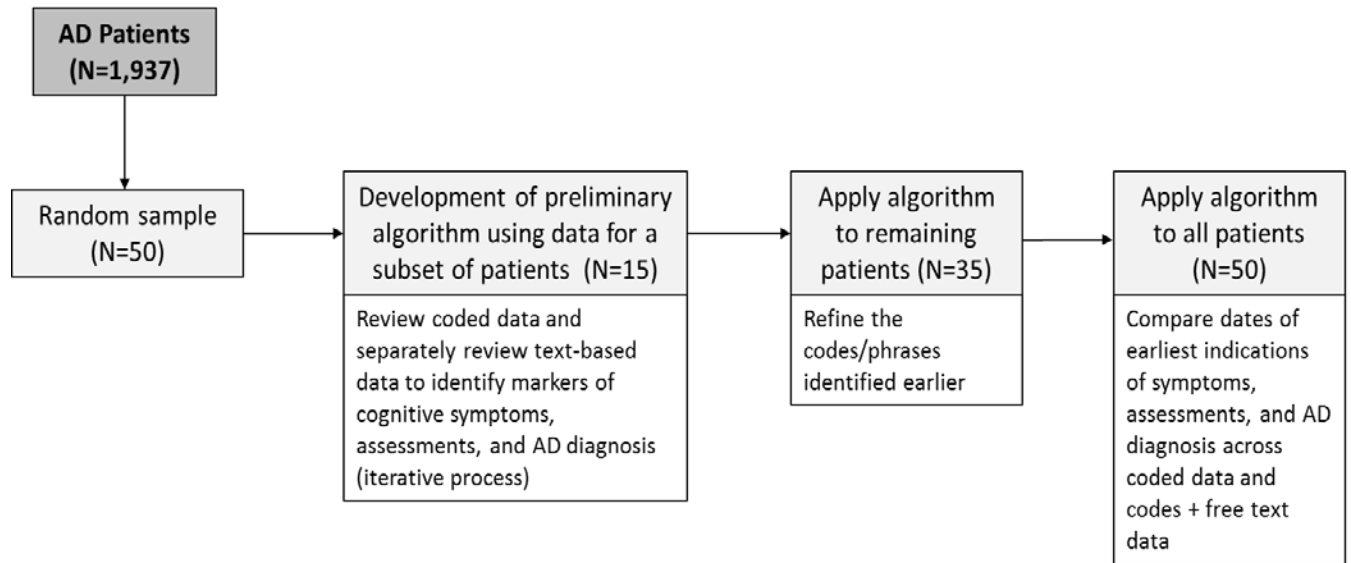

**Abbreviation:** AD = Alzheimer's disease

**Appendix Figure 2: Cognitive impairment and cognitive assessment relative to AD diagnosis**

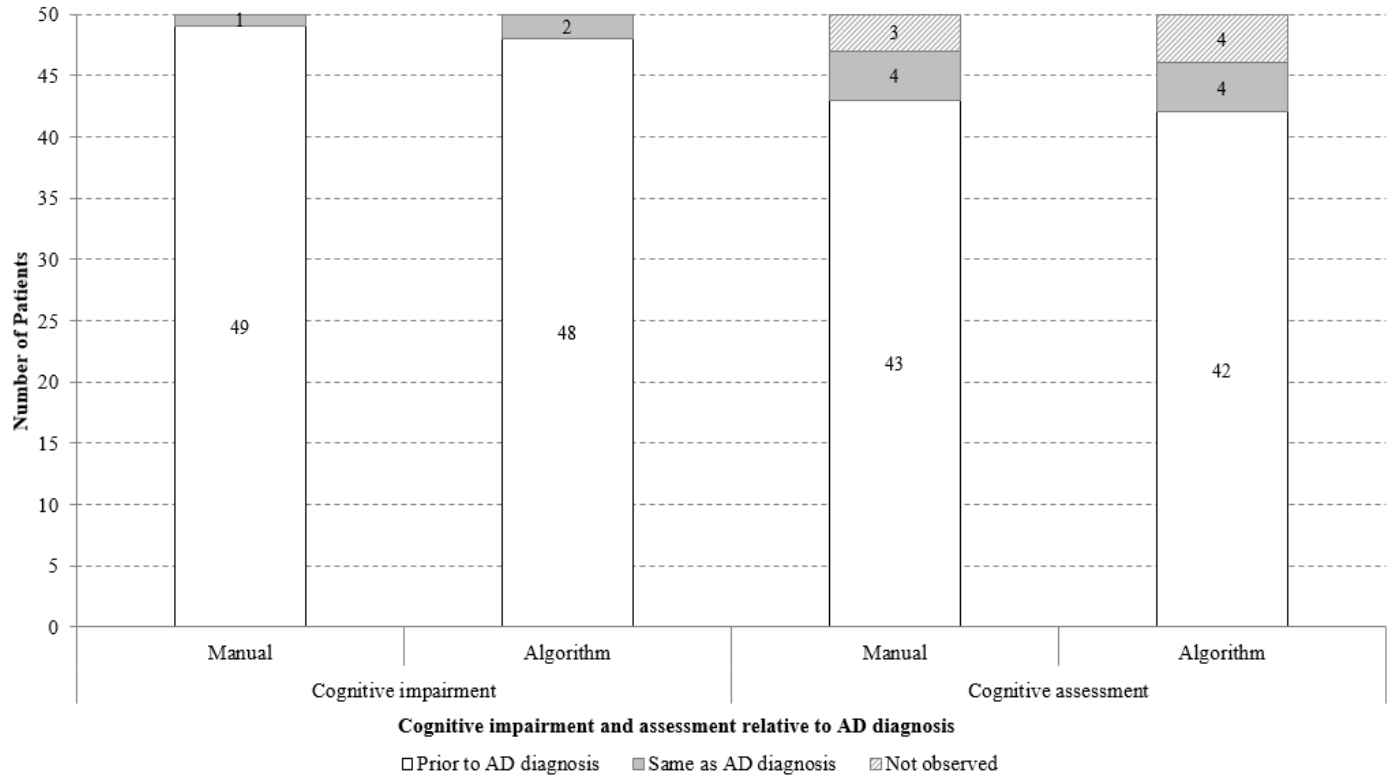

**Abbreviation:** AD = Alzheimer's disease

**Note:** Manual review included the review of both structured data and text-based data
